# Supplementary material for: Integrative epigenomic and transcriptomic analysis reveals the requirement of JUNB for hematopoietic fate induction
Source: PubMed Central journal article supplement (PMC9170695; doi:10.1038/s41467-022-30789-4), 2022-06-06
Supplement: 41467_2022_30789_MOESM2_ESM.pdf [file 41467_2022_30789_MOESM2_ESM.pdf]

## Peer Review File

---

Integrative epigenomic and transcriptomic analysis reveals the requirement of JUNB for hematopoietic fate induction

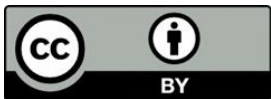

**Open Access** This file is licensed under a Creative Commons Attribution 4.0

International License, which permits use, sharing, adaptation, distribution and reproduction in any medium or format, as long as you give appropriate credit to

the original author(s) and the source, provide a link to the Creative Commons license, and indicate if changes were made. In the cases where the authors are anonymous, such as is the case for the reports of anonymous peer reviewers, author attribution should be to 'Anonymous Referee' followed by a clear attribution to the source work. The images or other third party material in this file are included in the article's Creative Commons license, unless indicated otherwise in a credit line to the material. If material is not included in the article's Creative Commons license and your intended use is not permitted by statutory regulation or exceeds the permitted use, you will need to obtain permission directly from the copyright holder. To view a copy of this license, visit <http://creativecommons.org/licenses/by/4.0/>.

## REVIEWER COMMENTS

Reviewer #1 (Remarks to the Author):

The manuscript by Chen et al. describes the molecular characterization of haematopoietic specification of human pluripotent stem cells (hPSCs). Despite several studies have described the development of haematopoietic lineages from hPSCs, the detailed mechanisms regulating the emergence of haematopoietic cells have not been elucidated. This translates in an overall poor efficiency of hPSC haematopoietic differentiation. Therefore, the question addressed is timely and of interest, as a better characterization of haematopoietic specification is needed and could, in principle, be exploited for the generation of transplantable haematopoietic cells from hPSC as well as for in vitro disease modelling. The results are interesting, however in my opinion there are some limitations that are left unanswered and need to be addressed to grant a publication in Nature Communication.

Specific points:

This reviewer understands the choice of focusing on bivalent genes. However, bivalence seems a poor predictor of a cell state when compared to ATAC-seq. Many genes, including JUNB which is the focus of the last part of the paper, is bivalent already in hPSCs a totally irrelevant stage for hematopoietic specification, but it is not expressed until the endothelial stage. Given this, this reviewer finds the analysis of bivalent genes in hPSCs that show a dramatic activation or repression in HSPCs not extremely relevant or meaningful. Since the authors have collected already all the data, it would be much better to analyze at differences between the different steps, so to map the developmental changes that occurs throughout the hematopoietic specification. In other words, what changes between the hPSC and mesoderm stage? Between mesoderm and endothelial cells? Between endothelial cells and HSPCs? Focusing the comparison between successive cell states will very likely uncover more relevant regulators and be much more helpful to the community.

The authors made the effort to compare in vitro derived hemogenic endothelial cells (HECs) with those found in the embryo. However, they only cherry-picked a particular stage of human embryonic development, CS13. This seems to be unfair, as the authors are clearly aware that there are other HECs which are thought to be devoid of HSC potential. As such, the authors should reperform similarity analysis of their cells comparing them to both CS10 and CS13 HECs. As their hPSC-derived HECs do not express HOXA genes, these cells are likely reflecting extra-embryonic progenitors, which are less capable to generate lymphoid cells and HSC.

As a reference, they should also compare in vitro-derived arterial cells with those found at CS10 and CS13 as well.

In addition, can the authors generate HOXA+ HECs or HECs with lymphoid potential so to verify that what they have described in the current manuscript are general principles of hematopoietic specification and is not restricted to a HOXA- developmental program?

The fact that hematopoietic development is dependent on activation of AP-1 TF family is already known. In Obier et al (Development 2016), the Bonifer group have already described part of the downstream effectors of the JUN axis during hematopoietic development, using a different strategy. This paper should be referenced and commented. In addition, since what is downstream of JUN is not exactly novel, can the authors use their thorough database to identify what triggers JUN activity (EGF, TNF or other cytokines? Hypoxia?) This would be novel and very useful for the wide community of laboratories differentiating hPSCs in blood cells.

When exactly JUNB plays a role in hematopoietic specification of hPSCs? No hematopoietic lineages are generated from JUNB KO but is unclear whether this is because HECs are absent and/or unable to make the transition to blood cells. Can the authors perform rescue experiments, overexpressing JUNB at the two critical stages (HEC specification and EHT) to see when it is required?

Minor points:

- The authors claim that CD44 expression is regulated directly by JUNB. But CD44 is also highly expressed in arterial cells and the CD184+ fraction representing cells with an arterial fate are present in JUNB KO differentiating cells. Is CD44 expression absent in the CD184+ cells as well or the lack of CD44 expression in JUNB KO cells is specific to HECs?
- Since HSCs are not generated via the protocol used in these studies, remove "S" from HSPC and refer to those cells as HPCs.
- KDR is the correct gene symbol for FLK1
- line 290: HAEC are human and not hemogenic arterial endothelial cells.
- There are several typos and language issues in the manuscript. Please proofread carefully to correct these, taking care of homogenizing the use of past and present tenses throughout the manuscript.

Reviewer #2 (Remarks to the Author):

The paper by Chen et al. describes epigenomic and transcriptomic analysis of cell populations emerging during hematopoietic differentiation of H1 hESCs. By analyzing hESC bivalent genes which get active during hematopoietic differentiation, authors discovered that JUNB has a bivalent promoter in hESCs and get activated in endothelial and hematopoietic cells. To find out whether JUNB has effect on hematopoietic differentiation, JUNB knockout hESCs were generated. These knockout cells failed to produce blood. By identifying JUNB as a master regulator of hematopoietic commitment in hESC differentiation culture this paper makes a novel contribution to our understanding of transcriptional program regulating hematopoietic development.

Comments:

1. To increase confidence in the obtained JUNB results and eliminate a possibility of off-target effects, authors should demonstrate if similar results can be obtained using several JUNB knockout clones. In addition, rescue experiments should be performed to show a restoration of hematopoietic potential in JUNB knockout cells following introducing exogenous JUNB.
2. What type of hematopoiesis produced in this system, extraembryonic or intraembryonic? Does JUNB affect intraembryonic or extraembryonic-type hematopoiesis or both? What types of CFU this protocol produces? Do CD34+ cells generated in this protocol possess lymphoid potential?
3. Please describe experimental design for experiments depicted in Fig.4. What was the starting population for these experiments, isolated CD34+ cells?
4. How hemogenic endothelial cluster and HPC clusters were identified? What are the differences in HPC-T1 and T2 clusters? Please provide in supplement RNAseq UMAP plots with marked RUNX1, CD44, SOX17, CDH5 and CD34 expression.
5. Authors found that hemogenic endothelium generated in hPSC cultures is highly proliferative. What about CS13-HEC?
6. In introduction, authors describe just two waves of embryonic hematopoiesis and failed to acknowledge its complexity and multiple waves (see DOI: 10.1038/nrm.2016.127).
7. Authors claim that JUNB knockout did not impair the generation of CD34+ EPCs. However, CD34 is broadly expressed in non-endothelial cell types. To ensure that this statement is correct, additional endothelial markers, such as VE-cadherin and CD31 should be evaluated in WT and KO cultures.

Minor:

1. Ref 5 and 6 are related to EHT in AGM region and are not related to EHT during primitive hematopoiesis.
2. Ref. 7 is incorrect. This reference describes the effect of VEGF and FGF2 on HUVECs and has nothing to do with mesodermal differentiation.
3. Line 50: hematopoietic endothelium should be hemogenic endothelium.
4. In result section, please introduce hPSC line used in this study (H1 hESC).
5. Line 140. SOX17 is involved in EHT, the major function of this gene is to promote arterial commitment.
6. Line 168. Correct H3K37me3 typo.
7. Line 273. FLK1 differences are negligible and not significant. Word "noticeable" should not be used. Please use the current KDR nomenclature for FLK1.

Reviewer #3 (Remarks to the Author):

To understand the mechanism of HSPC fate determination in humans, the authors dissect the epigenomic roadmap from hPSCs to HSPCs by profiling chromatin accessibility, histone modifications and transcriptome. Generally, the epigenetic feature dynamics and gene expression dynamics are highly correlated during differentiation. For the chromatin accessibility, the regulatory regions become accessible before key TF binding to the chromatin. For the histone modifications, the bivalent genes are characterized by stage-specific H3K4me3 and H3K27me3 during HSPC differentiation. Specifically, they reveal that EHT contains several intermediate subpopulations with unique transcriptome and chromatin states. Furthermore, they identify JUNB as a new regulator of HSPC differentiation and the deficiency of JUNB by iCRISPR will impair HEC formation and EHT.

Major comments:

1. Whether the differentiation protocol used in this study can generate functional HSPCs with complete self-renewal and engraftment abilities remains unknown.
2. Related to comment #1, if the generation of HSPC with complete engraftment ability is difficult to achieve, whether the profiling of epigenetic features and transcriptome features in this study can resolve the bottleneck of induction of real HSPC in vitro.
3. Sc-RNAseq data showed that Junb is expressed in EC and HPC populations. Functional analysis of Junb showed that it could regulate hematopoietic specification and ChIP-seq data showed hematopoietic genes were direct targets of JUNB. However, how JUNB regulates hematopoietic TFs specifically remains unclear.
4. JUNB deficiency impaired HEC and HSPC differentiation in vitro. Whether it can play the similar role in vivo? Can overexpression of JUNB facilitate the generation of functional human HSCs in vitro?

Minor comments:

1. The y-axis of the Fig 4h is not labeled.
2. The result of Fig 4g shows the developmental path of EHT, have you tried other analysis methods, such as RNA velocity to validate this result?
3. Since a lot of sequencing omics data have been obtained, why not building a website to display all the omics data in a visual way, so that readers can better use this information?

1 We thank the careful reading and critical comments from three reviewers.  
2 Those comments are valuable and very helpful for improving our manuscript.  
3 We have now conducted more experiments and extensive new analyses to  
4 address all reviewers' concerns. Please see the point-to-point responses below.  
5 The revised texts are marked in blue in the manuscript. To avoid confusion, we  
6 used Fig. 1, 2, 3, etc., to refer to Figures in the revised manuscript and Fig. R1,  
7 R2, R3, etc., to refer to Figures in this response letter.

8 **General comment 1**

9 **Both reviewer 1 (specific point 2<sup>nd</sup> paragraph) and reviewer 2 (comment 5)**  
10 **think that we should compare *in vitro* HECs to *in vivo* CS10 and CS13**  
11 **HECs.**

12 **Response:** We thank the reviewers for the valuable suggestion. Following the  
13 reviewer's advice, we compared *in vitro* HECs to CS10 HECs and CS13 HECs  
14 in parallel. **We have added the following results in the revised manuscript**  
15 **(Fig. 5, Lines 238-255, Page 10-11).**

16 The previous study showed two temporally and molecularly distinct HEC  
17 populations in the developing human embryo, and they first appear at CS10  
18 and CS13, respectively. Furthermore, CS10 HECs are thought to be devoid of  
19 definitive HSC potential, while CS13 HECs are considered to be HSC-primed  
20 HECs<sup>1</sup>. *In vitro* differentiated HPCs often have low lymphoid differentiation  
21 potential and are biased towards the myeloid lineage. Therefore, we reasoned  
22 that comparing *in vitro* HECs and CS13 HECs would provide logical clues to  
23 improve the differentiation system to obtain HPCs with expanded differentiation  
24 potential.

25 The results show that CS10 and CS13 HECs cluster together (Fig. R1 a), and  
26 the *in vitro* HECs are more similar to CS10 HECs (Pearson correlation R=0.9)  
27 than CS13 HECs (Pearson correlation R=0.8) at transcriptome level (Fig. R1  
28 a,b). We performed k-means clustering analysis of differentially expressed  
29 genes between *in vitro* HECs, CS10, and CS13 HECs and obtained 6 clusters  
30 (Fig. R1c). Genes in cluster 1 are upregulated in both CS10 HECs and CS13  
31 HECs, and these genes are related to hypoxia, which is attributed to the hypoxic  
32 tissue environment *in vivo* (Fig. R1c). Cluster 2 genes are upregulated  
33 specifically in CS13 HECs, and these genes are mainly involved in endothelium  
34 development and artery development. While *in vitro* HECs and CS10 HECs  
35 show less arterial endothelial features but upregulated genes related to cell  
36 cycle transition (Cluster 4) and DNA replication (Cluster 5), indicating that they  
37 are in an active proliferation state compared to CS13 HECs (Fig. R1c).

38 The correlation analysis suggest that our *in vitro* HECs are more similar with  
39 CS10 HECs, which are mostly extra-embryonic progenitors and less capable

40 to generate lymphoid cells and definitive HSCs. Our GO analyses also  
 41 suggest that culture in low oxygen condition, promoting arterial endothelial  
 42 features and cell cycle adjustment, may enhance the potential of *in vitro*  
 43 differentiated HECs to form definitive hematopoietic stem cells (HSCs).

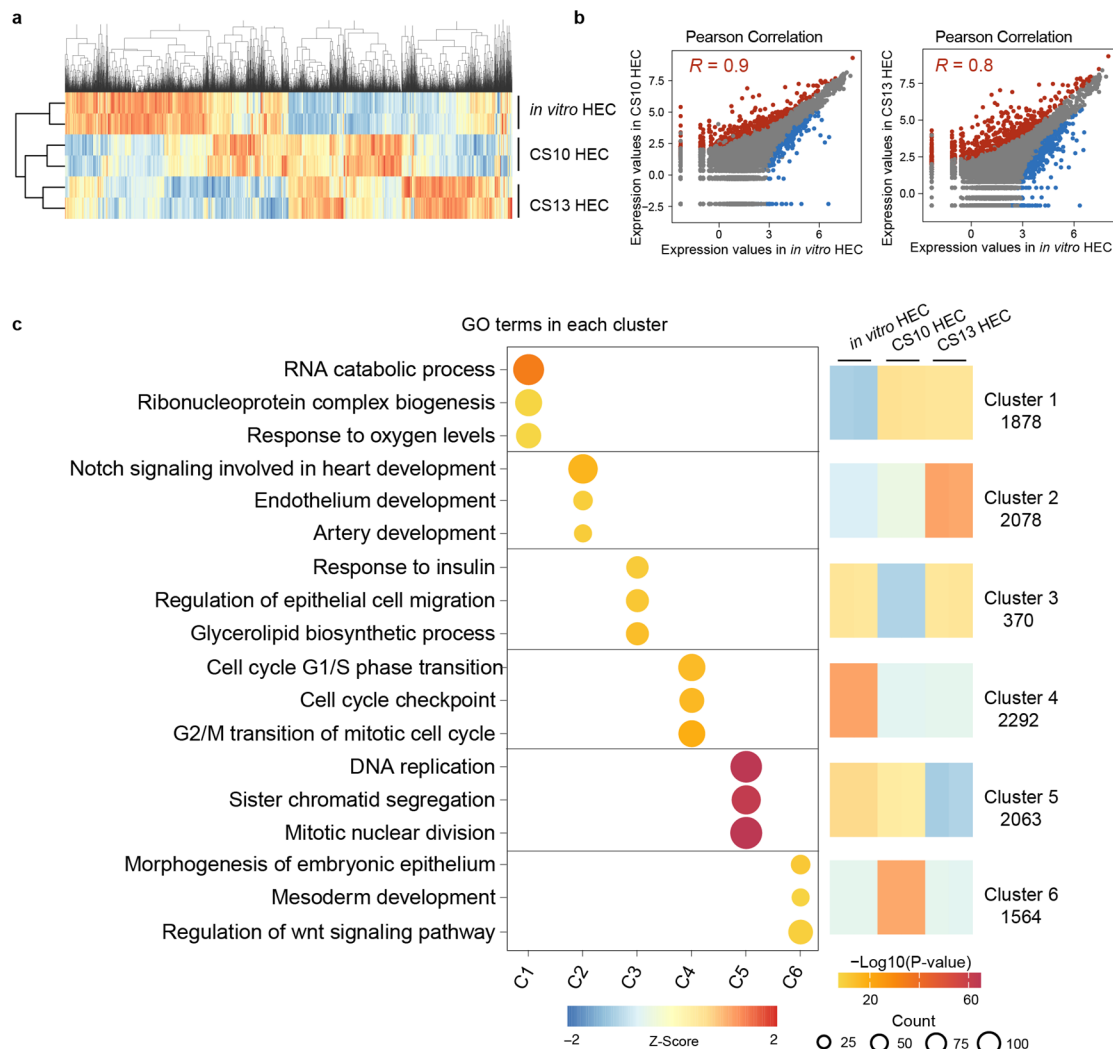

44

45 **Fig. R1. Comparison of single-cell transcriptome between *in vitro* HECs**  
 46 **and *in vivo* HEC.**

47 **a.** Heatmap showing the gene expression patterns in CS10 HECs, CS13 HEC, and *in vitro*  
 48 HEC. **b.** Scatterplots show the correlation between different paired groups with the  
 49 coefficient of determination (R). The differentially expressed genes (defined by FDR < 0.05  
 50 and fold change > 2 with Deseq2) are highlighted. **c.** GO analysis of top differentially  
 51 upregulated genes in CS10 HECs, CS13 HEC, and *in vitro* HEC.

52

53 **General comment 2**

54 Both reviewer 1 (specific point 4<sup>th</sup> paragraph) and reviewer 2 (comment 1)  
 55 suggest that we use multiple JUNB KO clones and perform the rescue  
 56 experiment of JUNB to prove the specificity of the JUNB KO phenotype.

57 **Response:** We thank the reviewers for raising this important question. We  
 58 generated another JUNB knock-out hPSC line (Fig. R2a, b) and repeated the  
 59 HPC differentiation experiments using two independent JUNB KO hPSC lines.  
 60 The new experiments show that JUNB deficiency severely impairs HEC and  
 61 HPC generation, which confirms previous conclusions (Fig. R2c, d). We have  
 62 added these results in the revised manuscript (**Fig. 7b, d and Fig, S6a,b, page**  
 63 **11-12, Lines 275-294**).

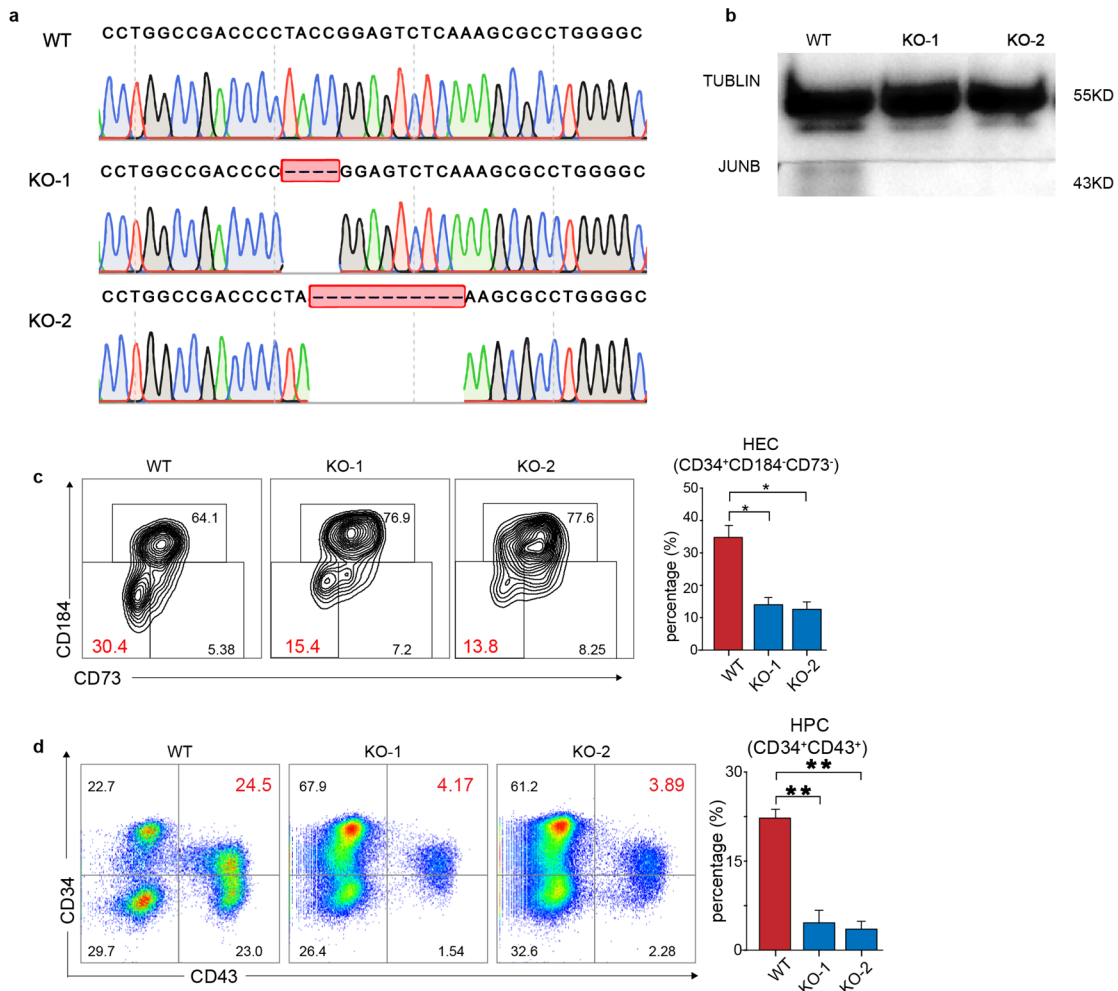

64 **Fig. R2. JUNB deficiency severely impairs hPSC differentiation into HECs**  
 65 **and HPC.**  
 66

67 **a, b** JUNB KO hPSC lines were verified by Sanger sequencing (a) and western blot (b). **c**  
 68 Representative flow cytometry density plots of HEC (CD34<sup>+</sup> CD184<sup>+</sup> CD73<sup>-</sup>) population on  
 69 day 6 in WT and JUNB KO cells, respectively. **d.** Representative flow cytometry density  
 70 plots of HPC (CD34<sup>+</sup> CD43<sup>+</sup>) on day 8 in WT and KO cells, respectively. Error bars  
 71 represent SD. P-values were calculated using Student's t-test, \*p-value < 0.05, \*\*p-value  
 72 < 0.01, \*\*\*p-value < 0.001.

73 Following the reviewer's suggestion, we also constructed two rescue cell lines  
 74 by inserting a DOX inducible JUNB cassette into JUNB KO hPSCs (Fig. R3a).  
 75 To determine the roles of JUNB at different stages of hematopoietic  
 76 specification, we induced its expression at different time windows. JUNB  
 77 becomes highly expressed on day 3 of the HPC differentiation when the cells  
 78 are primed to become EPCs and HECs. So, we added DOX from day 3 to day  
 79 5 to examine the function of JUNB in HEC formation (Fig. R3a). Similarly, to  
 80 investigate the role of JUNB in EHT, we added DOX from late day 5 to day 6  
 81 (24h), when EHT is underway (Fig. R3a).

82 The results show that re-introducing JUNB during day 3-5 increased the  
 83 percentage of HECs (about 25%) and HPCs (about 10%) compared to the  
 84 JUNB KO cells (about 15% and 4%, respectively), which confirms the  
 85 importance of JUNB in HEC and subsequent HPSC formation (Fig. R3b, c).  
 86 Furthermore, adding JUNB at the EHT window (day 6) also significantly  
 87 elevated HPC percentage (Fig. R3c), indicating HECs can effectively undergo  
 88 EHT upon JUNB compensation. Thus, the rescue experiments verify that JUNB  
 89 is essential for HPC formation by promoting HEC specification and EHT. **We**  
 90 **have added these results in the revised manuscript (Fig. 7g-j, page 13,**  
 91 **Lines 309-320).**

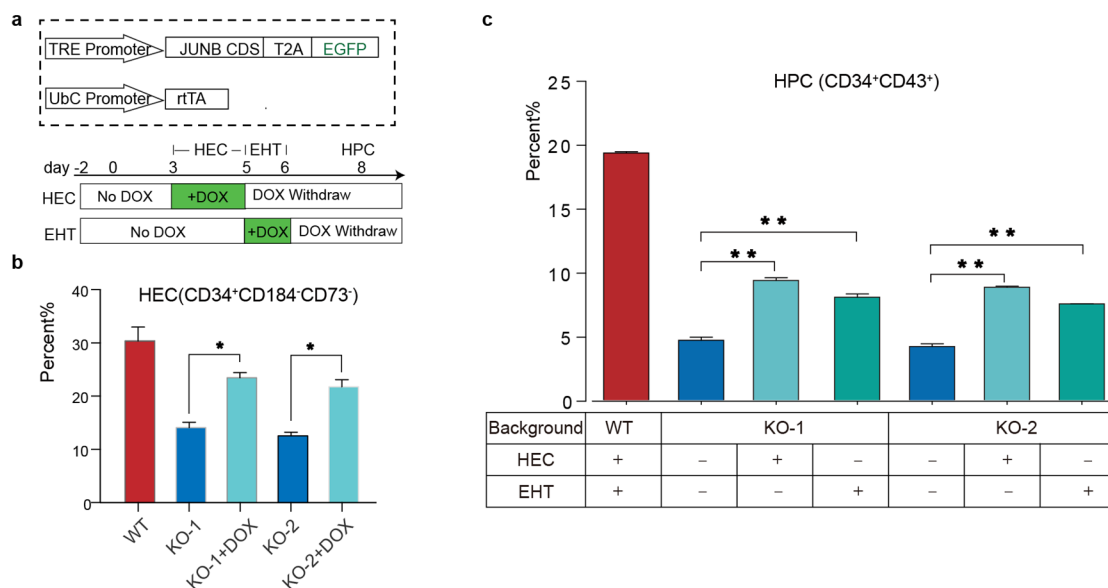

92  
 93 **Fig. R3. Rescue of JUNB expression during hPSC differentiation into HPC.**

94 **a.** Schematics showing the DOX inducible JUNB expression constructs (upper panel) and  
 95 the overview of the DOX treatment strategies during HPC differentiation (lower panel).  
 96 DOX was added during days 3-5 or 6 to induce JUNB during HEC formation or the EHT  
 97 process. **b.** Bar plot showing that DOX-induced ectopic JUNB expression from day 3 to  
 98 day 5 rescues HEC (CD34<sup>+</sup> CD73<sup>-</sup> CD184<sup>-</sup>) percentage. **c.** Bar plot showing that induction  
 99 of JUNB expression with DOX during either HEC specification or EHT stage increase HPC



100 (CD34<sup>+</sup> CD43<sup>+</sup>) percentage significantly. P-values were calculated using Student's t-test,  
101 \*p-value < 0.05, \*\*p-value < 0.01, \*\*\*p-value < 0.001.

## 102 **POINT-TO-POINT RESPONSES:**

### 103 **Reviewer #1**

104 The manuscript by Chen et al. describes the molecular characterization of  
105 hematopoietic specification of human pluripotent stem cells (hPSCs). Despite  
106 several studies have described the development of haematopoietic lineages  
107 from hPSCs, the detailed mechanisms regulating the emergence of  
108 haematopoietic cells have not been elucidated. This translates to an overall  
109 poor efficiency of hPSC haematopoietic differentiation. Therefore, the question  
110 addressed is timely and of interest, as a better characterization of  
111 haematopoietic specification is needed and could, in principle, be exploited for  
112 the generation of transplantable haematopoietic cells from hPSC as well as for  
113 *in vitro* disease modelling. The results are interesting, however in my opinion  
114 there are some limitations that are left unanswered and need to be addressed  
115 to grant a publication in Nature Communication.

116 **Response:** We appreciated Reviewer #1 for the supportive comments!

### 117 **Specific points:**

118 This reviewer understands the choice of focusing on bivalent genes. However,  
119 bivalence seems a poor predictor of a cell state when compared to ATAC-seq.  
120 Many genes, including JUNB which is the focus of the last part of the paper, is  
121 bivalent already in hPSCs a totally irrelevant stage for hematopoietic  
122 specification, but it is not expressed until the endothelial stage. Given this, this  
123 reviewer finds the analysis of bivalent genes in hPSCs that show a dramatic  
124 activation or repression in HSPCs not extremely relevant or meaningful. Since  
125 the authors have collected already all the data, it would be much better to  
126 analyze at differences between the different steps, so to map the  
127 developmental changes that occur throughout the hematopoietic specification.  
128 In other words, what changes between the hPSC and mesoderm stage?  
129 Between mesoderm and endothelial cells? Between endothelial cells and  
130 HSPCs? Focusing the comparison between successive cell states will very  
131 likely uncover more relevant regulators and be much more helpful to the  
132 community.

133 **Response:** We thank the reviewers for bringing up this precious suggestion,  
134 and we have now significantly expanded our study. Following the reviewer's  
135 advice, we have made great efforts to analyze the differences between the  
136 different steps, which has now led to several important discoveries.

137 To analyze the chromatin state across the course of differentiation, we  
 138 performed ChromHMM analysis<sup>2</sup> based on the profiles of two histone  
 139 modifications and identified four chromatin states: H3K4me3-only, bivalent,  
 140 unmarked, and H3K27me3-only states, respectively (Fig. R4a, b). The  
 141 annotation results show the H3K4me3-only regions and bivalent regions are  
 142 enriched in the transcription start sites (TSS) and promoter regions (Fig. R4b)  
 143 across all stages. Although both bivalent and H3K4me3-only regions have  
 144 similar chromatin accessibilities, the expression levels of bivalent genes are  
 145 lower, consistent with the fact that genes marked by bivalent histone  
 146 modifications are primed to be activated<sup>3</sup> (Fig. R4b,c). In contrast, both  
 147 unmarked and H3K27me3-only regions have low gene expression levels and  
 148 chromatin accessibility (Fig. R4b, c).

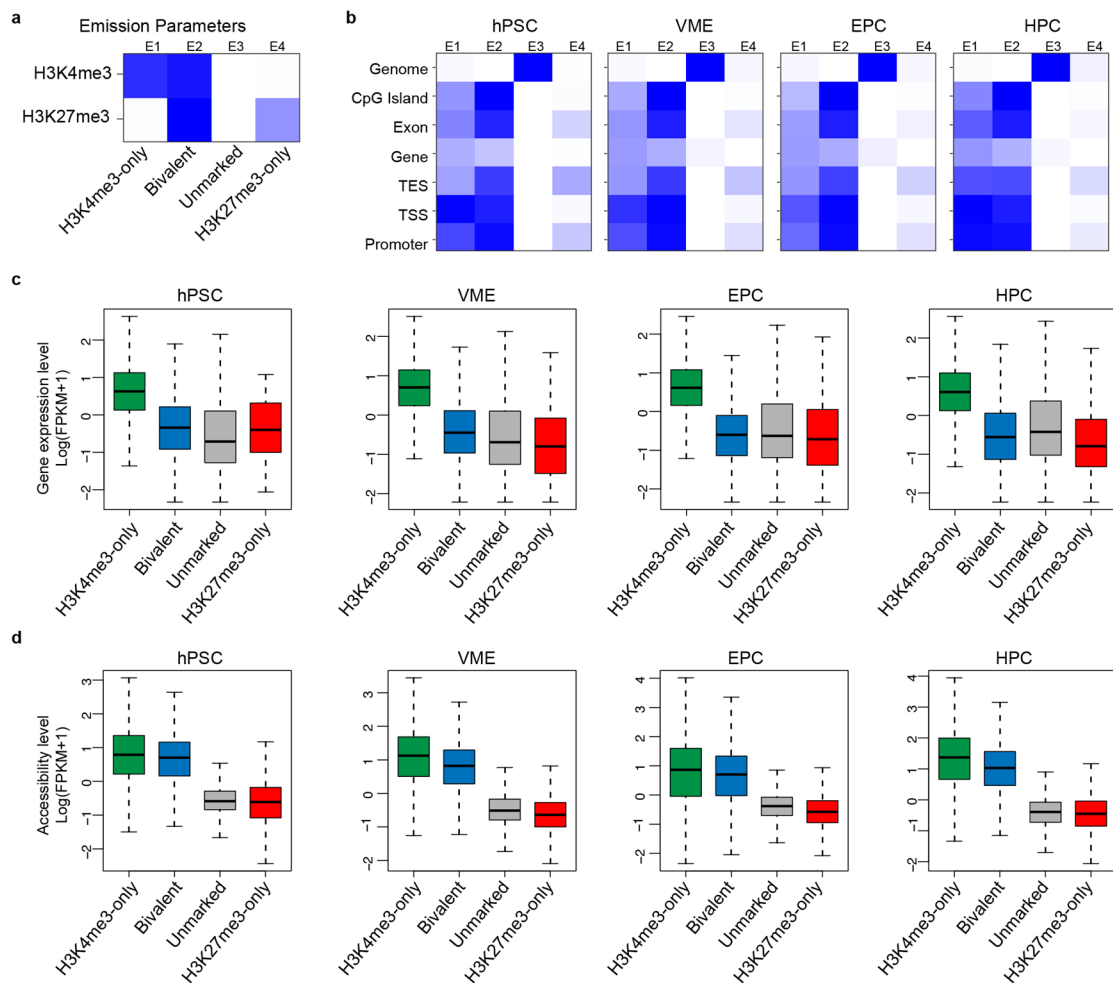

149 **Fig. R4. Dynamics of histone modification landscapes during HPC**  
 150 **differentiation.**  
 151

152 **a.** Heatmap showing four chromatin states inferred from ChIP-seq datasets based on  
 153 ChromHMM algorithm. Each row corresponds to a different histone mark, and each  
 154 column corresponds to a different chromatin state. Regions with low H3K4me3 or H3K27me3  
 155 modifications are labeled unmarked, whereas regions with both H3K4me3 and H3K27me3

156 are labeled bivalent. Darker colors indicate higher probabilities. **b.** Heatmaps showing  
157 genomic distributions of four chromatin states in each stage during differentiation. **c, d.**  
158 Boxplots showing gene expression levels (**c**) and chromatin accessibilities (**d**) of four  
159 chromatin states in each stage during differentiation. FPKM, fragments per kilo-base of  
160 transcript per million reads mapped.

161 Bivalent domains are often found at promoters of developmental genes<sup>4</sup>.  
162 Information about the dynamic change of bivalent genes during differentiation  
163 can aid the identification of lineage regulators<sup>5, 6</sup>. Thus, we analyzed the  
164 bivalent domain profile between successive cell types during the hematopoietic  
165 specification process. We found that the number of bivalent domains is highest  
166 in hPSC, reflecting more developmental regulators poised in the pluripotent  
167 state than other progenitor cell types (Fig. R5a).

168 We next examined the dynamics of bivalent domains and their associated gene  
169 expression levels during HPC differentiation. We enumerated the 4 modes of  
170 changes in bivalent domains and calculated the ratio of each mode (Fig. R5b,  
171 c). During hPSC differentiation into VME, about 20% of bivalent domains lose  
172 H3K27me3 marks but gradually gain H3K4me3 levels and turn into H3K4me3-  
173 only regions. Correspondingly, their related genes get activated (Fig. R5d). GO  
174 analysis of these activated genes show that the most significant terms include  
175 mesoderm development ( $P < 1 \times 10^{-7}$ ) and response to BMP ( $P < 1 \times 10^{-8}$ ) (Fig.  
176 R5e), which reflect under the stimulation of BMP4 and CHIR, bivalent genes  
177 involved in mesoderm specification (e.g., GATA6, HAND1, and BMP2) are  
178 rapidly activated (Fig. R5f). Similarly, from VME to EPC, nearly 20% of bivalent  
179 domains turn into H3K4me3-only regions. Prominent GO terms for these genes  
180 related to endothelium development (Fig. R5g-i). Interestingly, genes involved  
181 in hematopoietic progenitor cell differentiation are also induced and activated  
182 in the EPC stage, which suggest the hematopoietic program is already primed  
183 in the EPC as indicated by the activation of MYB (Fig. R5i). As a result, only a  
184 few bivalent domains (about 7%) turn into H3K4me3-only states from day 5  
185 EPC to day 8 HPC (Fig. R5c). These analyses suggest that the key bivalent  
186 genes encoding stage-specific regulators are resolved and activated  
187 appropriately to promote cell fate transitions during HPC differentiation.

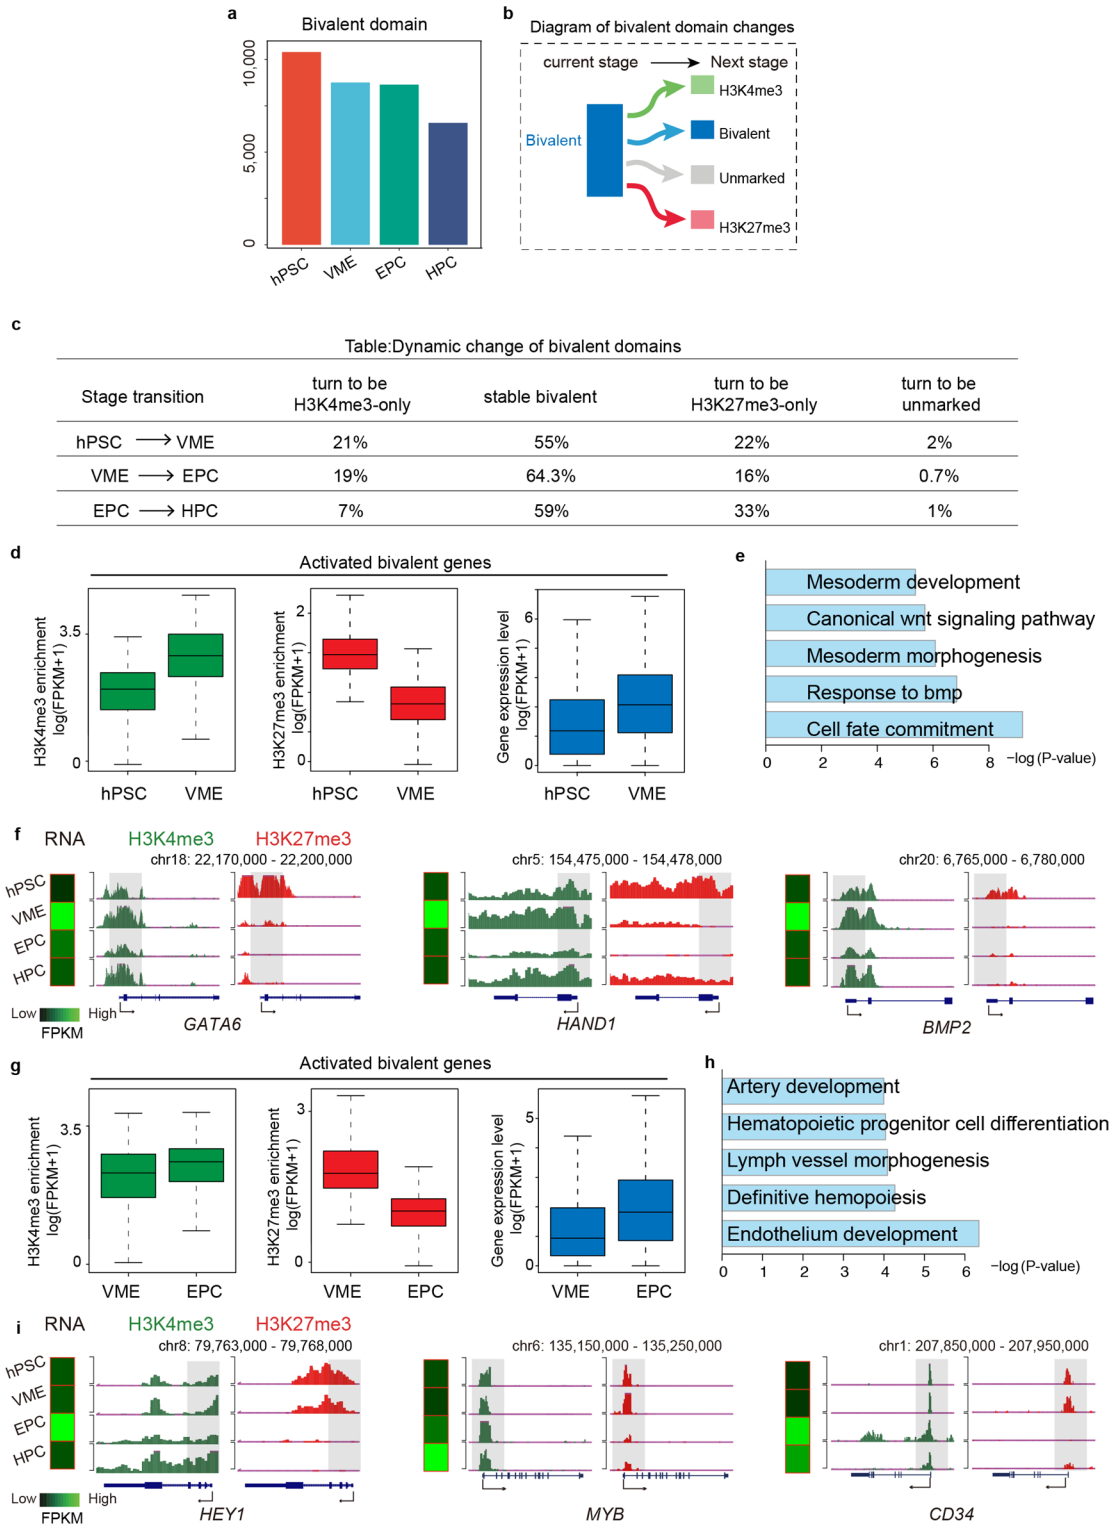

188

189 **Fig. R5. Dynamics of active bivalent domains during hPSC to HPC**  
 190 **differentiation.**

191 **a.** Bar chart showing the number of bivalent domains at each cell population. **b,c.**  
 192 Schematic diagram of bivalent domains dynamic changes (**b**) and the corresponding  
 193 ratios(**c**) between successive cell state transition.

194 changes of H3K4me3 (left), H3K27me3 (middle), and gene expression (right) of activated  
195 bivalent genes during hPSC to VME transition. **e.** GO term analyses of active bivalent  
196 genes during the hPSC to VME transition. **f.** The UCSC browser views show H3K4me3  
197 and H3K27me3 modification profiles during hPSC to VME transition. The promoter regions  
198 are shaded. The normalized RNA-seq FPKM for each gene at different stages is shown  
199 on the left. **g.** Boxplots showing the dynamic changes of H3K4me3 (left), H3K27me3  
200 (middle), and gene expression (right) of activated bivalent genes during the VME to EPC  
201 transition. **h.** GO term analyses of active bivalent genes during VME to EPC transition. **i.**  
202 The UCSC browser snapshots show H3K4me3 and H3K27me3 profiles during VME to  
203 EPC transition. The promoter regions are shaded. The normalized RNA-seq FPKM for  
204 each gene at different time point stages are shown on the left. The view scale of the  
205 genome browser is adjusted according to the global data range.

206 Between every two successive steps, many bivalent domains remain covered  
207 by H3K4me3 and H3K27me3 signals, and the related genes remain silenced  
208 (Fig. R6a-c). These genes are mainly involved in non-hematopoietic lineage  
209 commitment, such as embryonic organ development and neuron fate  
210 commitment (Fig. R6d). Thus, the stable bivalent modifications can safeguard  
211 the hematopoietic lineage commitment in the *in vitro* differentiation system.  
212 However, HOXA5, HOXA9, and HOXA10, which play critical roles in definitive  
213 HSC generation and proliferation<sup>7,8</sup>, are also stable bivalent genes throughout  
214 the *in vitro* HPC differentiation (Fig. R6e). In addition, the chromatin around  
215 these genes remains largely inaccessible (Fig. R6f), suggesting a lack of  
216 activating factors specific to the HOXA gene cluster during the differentiation  
217 process. Therefore, additional efforts should be made to precisely regulate the  
218 repression and activation of bivalent genes to further optimize the *in vitro*  
219 hematopoietic system.

220 Collectively, the analysis of bivalent genes provided insights into the unique  
221 features of transcriptional and epigenetic regulation of *in vitro* HPC formation.  
222 **We have added these results in the revised manuscript (Fig. 3 and Fig. S3,**  
223 **page Lines 146-190).**

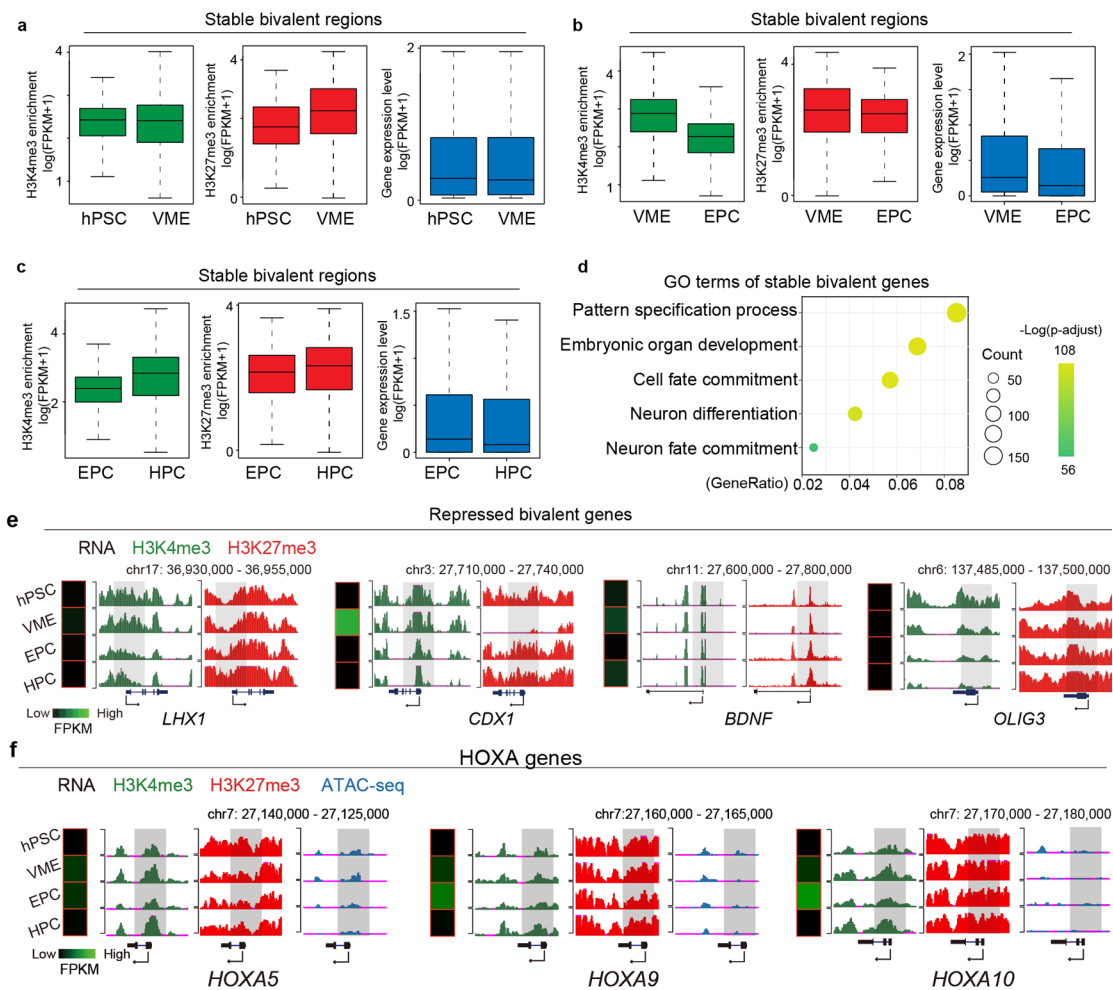

224

225 **Fig. R6. Dynamics of stable bivalent domains during hPSC-HPC**  
 226 **differentiation.**

227 **a-c.** Boxplots showing H3K4me3 (left), H3K27me3 (middle) signal intensities and their  
 228 associated gene expression levels (right) of stable bivalent marked regions during the  
 229 processes of hPSC to VME (**a**), VME to EPC (**b**), and EPC to HPC (**c**). The signal densities  
 230 are calculated as H3K4me3 and H3K27me3 ChIP-seq RPKM (reads per million reads per  
 231 kb). **d.** GO terms of stable bivalent domain associated genes. **e, f.** The UCSC browser  
 232 snapshots show H3K4me3 and H3K27me3 modification profiles of the selected genes.  
 233 The promoter regions are shaded. The normalized RNA-seq FPKM for each gene at  
 234 different time points are shown on the left. The view scale of the genome browser is  
 235 adjusted according to the global data range.

236 The authors made the effort to compare *in vitro* derived hemogenic endothelial  
 237 cells (HECs) with those found in the embryo. However, they only cherry-picked  
 238 a particular stage of human embryonic development, CS13. This seems to be  
 239 unfair, as the authors are clearly aware that there are other HECs which are  
 240 thought to be devoid of HSC potential. As such, the authors should reperform  
 241 similarity analysis of their cells comparing them to both CS10 and CS13 HECs.

242 As their hPSC-derived HECs do not express HOXA genes, these cells are likely  
 243 reflecting extra-embryonic progenitors, which are less capable to generate  
 244 lymphoid cells and HSC.

245 **Response:** We thank the reviewer for raising this important question. We  
 246 have compared *in vitro* HECs to CS10 HECs and CS13 HECs in parallel.  
 247 Please refer to our response to General Comment 1 (Fig. R1) for details.

248 As a reference, they should also compare *in vitro*-derived arterial cells with  
 249 those found at CS10 and CS13 as well.

250 **Response:** We thank the reviewers for these comments. The comparison  
 251 among *in vitro* AECs, CS10 AECs, and CS13 AECs in parallel also shows that  
 252 *in vitro* AEC is more similar to CS10 AECs than CS13 AECs at transcriptome  
 253 level (Fig. R7a). Similar to *in vivo* HEC, genes related to hypoxia are  
 254 upregulated both in CS10 AECs and CS13 AECs (Fig.R7b). And *in vitro* AECs  
 255 express higher levels of genes related to the cell cycle transition process (Fig.  
 256 R7b), indicating that *in vitro* AEC is also in an active proliferation state like *in*  
 257 *vitro* HEC, likely due to the high concentration of VEGF, FGF2, and B27  
 258 supplements in the culture medium.

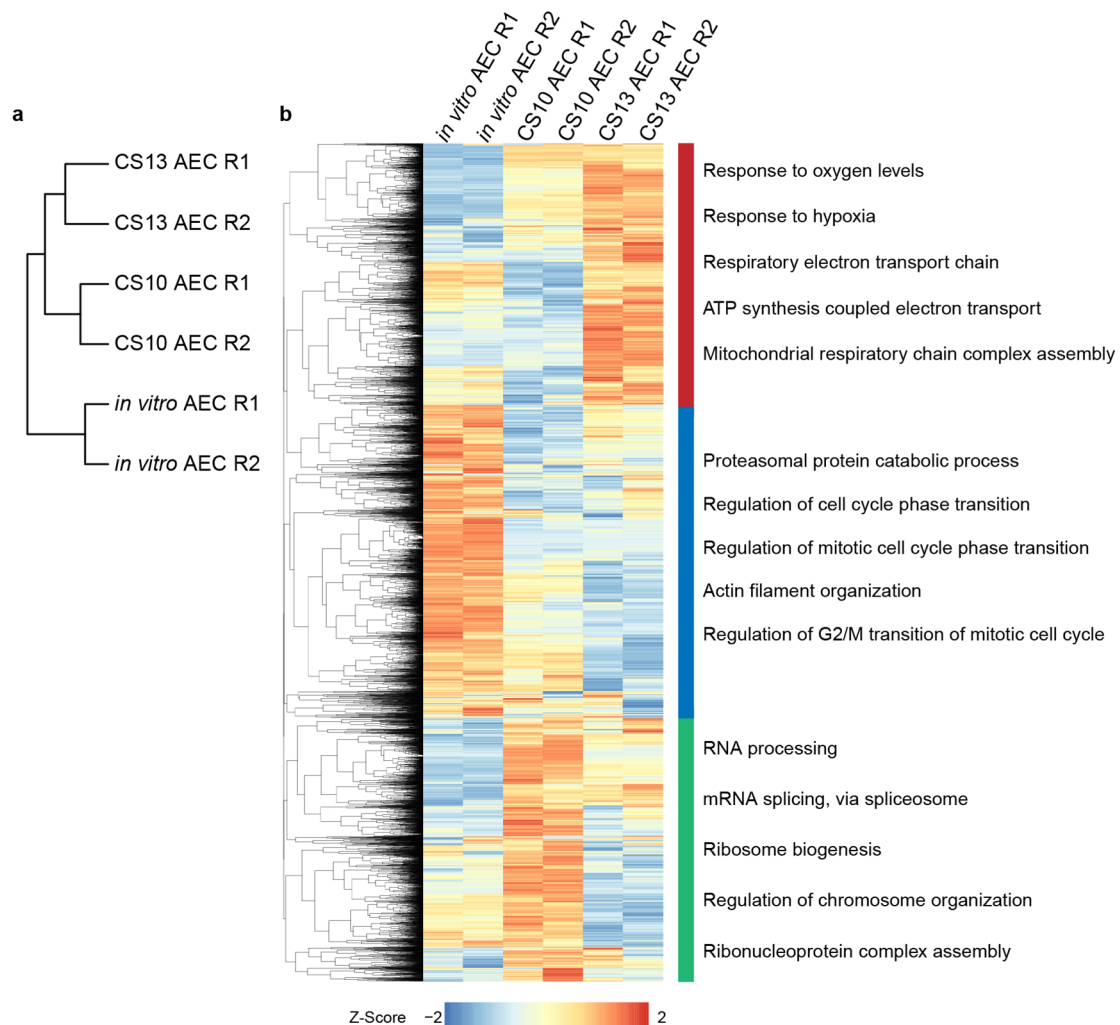

259

260 **Fig. R7. Comparison of single-cell transcriptome between *in vitro* AECs**  
261 **and *in vivo* AECs.**

262 **a.** Hierarchical clustering of CS10 AEC, CS13 AEC, and *in vitro* AEC based on their  
263 transcriptome. **b.** Heat map showing gene expression patterns of CS10 AEC, CS13 AEC,  
264 and *in vitro* AEC (left). The enriched GO terms of top differential upregulated genes in each  
265 cell type are listed on the right.

266 In addition, can the authors generate HOXA<sup>+</sup> HECs or HECs with lymphoid  
267 potential so to verify that what they have described in the current manuscript  
268 are general principles of hematopoietic specification and is not restricted to a  
269 HOXA- developmental program?

270 **Response:** We thank the reviewer for raising this question. It is an intriguing  
271 and important question if HOXA<sup>+</sup> HEC or definitive HSPC formation *in vitro* also  
272 share similar epigenetic regulation principles. We think that many global  
273 changes in the epigenome and the TFs involved will be similar, particularly from  
274 hPSC to VME and VME to EPC.

275 Insufficient expression of HOXA genes and poor lymphoid differentiation  
276 potential is the limitation of most *in vitro* HSPC differentiation systems. Dou et  
277 al. used the EB differentiation method to obtain HSPC. Initially, they got HSPC  
278 with low HOXA gene expression and presumably low lymphoid differentiation  
279 potential. When they treated their EB-derived CD34<sup>+</sup> cells with all-trans retinoic  
280 acid (ATRA), increased expression of medial HOXA genes was observed<sup>9</sup>. We  
281 think the EB-derived CD34<sup>+</sup> cells in their study may be similar to our  
282 CD31<sup>+</sup>CD34<sup>+</sup> EPCs. Their ATAC-seq study showed that ATRA treatment  
283 helped open up chromatin at HOXA gene clusters in CD45<sup>+</sup> CD34<sup>+</sup> CD90<sup>+</sup>  
284 hESC-HSPCs. However, they did not test the reconstitution ability of their  
285 HOXA gene-activated HSPCs. We think it is likely that ATRA treatment will help  
286 remove the H3K27me3 on the bivalent HOXA genes. In our ATAC-seq, we  
287 detected 70x10<sup>3</sup> peaks, and 40% were at the promoters in EPC and HPC (Fig  
288 1d and Fig S1), which is about 28 x10<sup>3</sup> peaks. In the Dou et al. study, about  
289 1000 peaks within 500kb to TSS were induced by the RARA agonist AM580<sup>9</sup>.  
290 That much less than 28 x10<sup>3</sup> peaks at promoter regions. Therefore, we think  
291 that the global chromatin patterns observed in our study are likely to be general  
292 principles.

293 It would be ideal to profile the epigenetic roadmap in an *in vitro* differentiation  
294 system with definite lymphoid differentiation potential. However, to generate  
295 definitive HSC with lymphoid potential and reconstitution ability usually need  
296 the ectopic expression of several transcription factors in HSPCs<sup>10</sup>. Thus, the  
297 epigenome of these HSPCs may not accurately correlate with their



298 transcriptome. Differentiation via the embryoid body (EB) format has also been  
299 shown to produce definite HSC with lymphoid differentiation potential <sup>11</sup>.  
300 However, EBs contain a very heterogeneous cell population, and it is  
301 challenging to purify the small cell populations with definitive lymphoid  
302 differentiation potential for epigenetic profiling. Uenishi et al. reported that fine-  
303 tune Notch signaling with DLL1-Fc and DAPT leads to the generation of  
304 definitive hemogenic endothelium (HE) and hematopoietic progenitors (HPs)  
305 from hPSCs. They showed that after optimizing differentiation protocol, 1 in 14  
306 HPs have T-cell potential in limiting dilution assay (LDA)<sup>12</sup>. Therefore, a better  
307 marker for definitive HECs in the human system would be beneficial to purify  
308 this rare population of cells.

309 Based on our integrative epigenetic analysis and information from other  
310 published works, we think that improving the arterial feature of HEC, hypoxia  
311 microenvironment, and treatment with PRC2 inhibitor to remove H3K27me3 on  
312 key TFs may improve the definitive hematopoiesis potential of hPSC derived  
313 HECs and HPCs. Moreover, reliable markers or reporters for definitive human  
314 HECs will be valuable tools. The definitive human HECs need to be validated  
315 in *in vitro* differentiation and *in vivo* transplantation assays which require  
316 considerable time. These will be the goal of our following up study but beyond  
317 the scope of our current investigation.

318 The fact that hematopoietic development is dependent on activation of AP-1 TF  
319 family is already known. In Obier et al (Development 2016), the Bonifer group  
320 have already described part of the downstream effectors of the JUN axis during  
321 hematopoietic development, using a different strategy. **This paper should be**  
322 **referenced and commented.** In addition, since what is downstream of JUN is  
323 not exactly novel, **can the authors use their thorough database to identify**  
324 **what triggers JUN activity** (EGF, TNF or other cytokines? Hypoxia?) This  
325 would be novel and very useful for the wide community of laboratories  
326 differentiating hPSCs in blood cells.

327 **Response:** We thank the reviewer for pointing this out. We have now added  
328 the citation to our discussion (**Page 15 Lines 369-371, revised manuscript**).

329 Our transcriptome data reveal that JUNB is induced at the EPC stage (Fig. 6a).  
330 To check whether JUNB is activated by VEGF or bFGF, or both. We treated  
331 cells with only bFGF, VEGF, or both for 8 hours. The results show that VEGF  
332 signaling, but not bFGF signaling, activates JUNB expression (Fig. R8a).  
333 JUNB transcript level is significantly higher in single ECs from a 3D Scaffold  
334 differentiation protocol (our unpublished study) than in single ECs from the  
335 current monolayer differentiation protocol (Fig. R8b). As the 3D Scaffold

336 creates a more hypoxia environment (according to the transcriptome analysis)  
 337 than monolayer culture, we think hypoxia may also elevate JUNB expression.

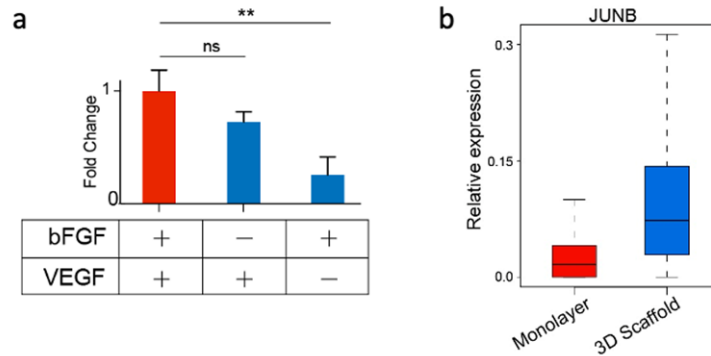

338

339 **Fig. R8. The expression of JUNB with and without VEGF treatment.**

340 **a.** Bar chart showing JUNB expression levels under bFGF and VEGF induction. P-values  
 341 were calculated using Student's t-test, \*p-value < 0.05, \*\*p-value < 0.01, \*\*\*p-value < 0.001.  
 342 p-value > 0.05 is indicated by "ns" for not significant. **b.** JUNB expression in single ECs  
 343 from monolayer differentiation (data from this study) and in single ECs differentiated in 3D  
 344 Scaffold (our unpublished study).

345 When exactly JUNB plays a role in hematopoietic specification of hPSCs? No  
 346 hematopoietic lineages are generated from JUNB KO but is unclear whether  
 347 this is because HECs are absent and/or unable to make the transition to blood  
 348 cells. Can the authors perform rescue experiments, overexpressing JUNB at  
 349 the two critical stages (HEC specification and EHT) to see when it is required?

350 **Response:** We thank the reviewer for raising this important question. **We have**  
 351 **now performed rescue experiments, and our results show that both at the**  
 352 **HEC formation stage and EHT stage, the induction of JUNB successfully**  
 353 **rescued HPCs generation. Please refer to our response to General**  
 354 **Comment 2 (Fig. R2) for details.**

355 **Minor points:**

356 - The authors claim that CD44 expression is regulated directly by JUNB. But  
 357 CD44 is also highly expressed in arterial cells and the CD184<sup>+</sup> fraction  
 358 representing cells with an arterial fate are present in JUNB KO differentiating  
 359 cells. Is CD44 expression absent in the CD184<sup>+</sup> cells as well or the lack of CD44  
 360 expression in JUNB KO cells is specific to HECs?

361 **Response:** We thank the reviewer for this question. The previous study had  
 362 shown that CD44 is expressed in arterial ECs (AECs) and HECs but seldom in  
 363 venous ECs in the early human embryo<sup>1</sup>. JUNB is in all ECs, albeit with higher  
 364 expression in HECs. We believe that CD44 should not be exclusively controlled  
 365 by JUNB. We tested CD44 expression by qPCR, and the results show CD44 is

366 slightly down-regulated in JUNB KO AECs but not significantly (Fig. R9a). This  
 367 may indicate that JUNB is not essential for CD44 expression in AECs. JUNB  
 368 ablation leads to a 2-fold drop in CD44 gene expression compared to the WT  
 369 HECs (Fig. 7e). Our JUNB CUT&Tag result in HECs shows that JUNB binds to  
 370 the promoter of CD44 (Fig. R9b). Together, these results indicate that the  
 371 transcription of CD44 is partially controlled by JUNB in HECs. While in AEC,  
 372 where CD44 levels are lower, the activity of JUNB is not required for CD44  
 373 expression.

374 A previous study found that the CD44 level increased significantly during EHT<sup>13</sup>.  
 375 Therefore, JUNB may be required for the upregulation of CD44 in HECs  
 376 undergoing EHT.

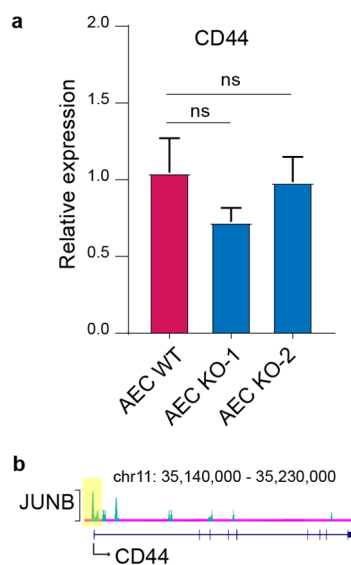

377

378 **Fig. R9. The expression of JUNB with and without VEGF treatment.**

379 **a.** Bar plot showing the expression levels of CD44 in WT AEC and JUNB KO AEC. **b.** The  
 380 UCSC browser snapshots show the binding for JUNB at the genetic loci of CD44. Promoter  
 381 regions are highlighted in yellow. P-values were calculated using Student's t-test, \*p-value  
 382 < 0.05, \*\*p-value < 0.01, \*\*\*p-value < 0.001, p-value > 0.05 is indicated by "ns" for not  
 383 significant.

384 - Since HSCs are not generated via the protocol used in these studies, remove  
 385 "S" from HSPC and refer to those cells as HPCs.

386 **Response:** We thank the reviewer for this suggestion, and we have substituted  
 387 all the "HSPC" with "HPC" in the revised manuscript.

388 - KDR is the correct gene symbol for FLK1

389 **Response:** We thank the reviewer for pointing this out, and we have changed  
 390 FLK1 to KDR in the revised manuscript and figures.

391 - line 290: HAEC are human and not hemogenic arterial endothelial cells.

392 **Response:** We thank the reviewer for pointing this out. We sincerely apologize  
393 for this mistake, and we have corrected it in the revised manuscript.

394 - There are several typos and language issues in the manuscript. Please  
395 proofread carefully to correct these, taking care of homogenizing the use of past  
396 and present tenses throughout the manuscript.

397 **Response:** We thank the reviewer for pointing this out. We sincerely apologize  
398 for these mistakes, and we have corrected them across the revised manuscript.

399

#### 400 **Reviewer #2 (Remarks to the Author):**

401 The paper by Chen et al. describes epigenomic and transcriptomic analysis of  
402 cell populations emerging during hematopoietic differentiation of H1 hESCs. By  
403 analyzing hESC bivalent genes which get active during hematopoietic  
404 differentiation, authors discovered that JUNB has a bivalent promoter in hESCs  
405 and get activated in endothelial and hematopoietic cells. To find out whether  
406 JUNB has effect on hematopoietic differentiation, JUNB knockout hESCs were  
407 generated. These knockout cells failed to produce blood. By identifying JUNB  
408 as a master regulator of hematopoietic commitment in hESC differentiation  
409 culture this paper makes a novel contribution to our understanding of  
410 transcriptional program regulating hematopoietic development.

411 **Response:** We thank the reviewer for the encouraging comments and  
412 appreciate the values and significance of our work.

#### 413 **Comments:**

414 1. To increase confidence in the obtained JUNB results and eliminate a  
415 possibility of off-target effects, authors should demonstrate if similar results can  
416 be obtained using several JUNB knockout clones. In addition, rescue  
417 experiments should be performed to show a restoration of hematopoietic  
418 potential in JUNB knockout cells following introducing exogenous JUNB.

419 **Response:** We thank the reviewer for raising this important question. **We have  
420 now repeated the experiments with another JUNB knockout clone and get  
421 the consistent results. Follow the reviewer's suggestion, we also have  
422 performed rescue experiment and our results show that both at the HEC  
423 formation stage and EHT stage, the induction of JUNB successfully  
424 rescued HPCs generation. Please refer to our response to General  
425 Comment 2 (Fig. R2) for details.**

426 2. What type of hematopoiesis produced in this system, extraembryonic or  
427 intraembryonic? Does JUNB affect intraembryonic or extraembryonic-type  
428 hematopoiesis or both? What types of CFU this protocol produces? Do CD34+  
429 cells generated in this protocol possess lymphoid potential?

430 **Response:** We thank the reviewer for raising these critical questions. We have  
431 performed PCA analysis of the transcriptome of our HPC and published  
432 datasets. The HPCs (CD34<sup>+</sup>CD43<sup>+</sup>) produced in our study is the most similar  
433 to HSPC differentiated using the EB method (Fig. R10a). They also have a  
434 closer resemblance to the fetal liver (FL) HSC and umbilical cord blood (USC)  
435 HSC than to the aorta-gonadal-mesonephros (AGM) HSC. Therefore, they are  
436 skewed towards extraembryonic hematopoiesis (Fig. R10a). In our system, we  
437 found that JUNB plays essential roles in HEC formation and the EHT process,  
438 which are shared by extraembryonic and intraembryonic-type hematopoiesis.  
439 In addition, the results from JUNB knockout (KO), overexpression (OE), and  
440 CUT&Tag experiments demonstrated that it regulates many key intraembryonic  
441 hematopoiesis genes such as RUNX1 and GATA2 (Fig. R10b). Therefore, we  
442 believe JUNB affects both intraembryonic and extraembryonic-type  
443 hematopoiesis.

444 Following reviewer 2's suggestion, we did the colony-formation unit (CFU)  
445 experiments with our HPCs (CD43<sup>+</sup>CD34<sup>+</sup>). The results show that our HPCs  
446 can form typical erythroid (CFU-E and BFU-E), granulocyte (CFU-G),  
447 macrophage (CFU-M), granulocyte–macrophage (CFU-GM), and multi-lineage  
448 (CFU-GEMM) colonies, which are primarily myeloid lineage cell types (Fig.  
449 R10c). We have temped to induce CD34<sup>+</sup> HPCs to differentiate into T cells but  
450 did not detect CD4<sup>+</sup> and CD8<sup>+</sup> T cells. Thus, our HPCs seem to have poor  
451 lymphoid potential.

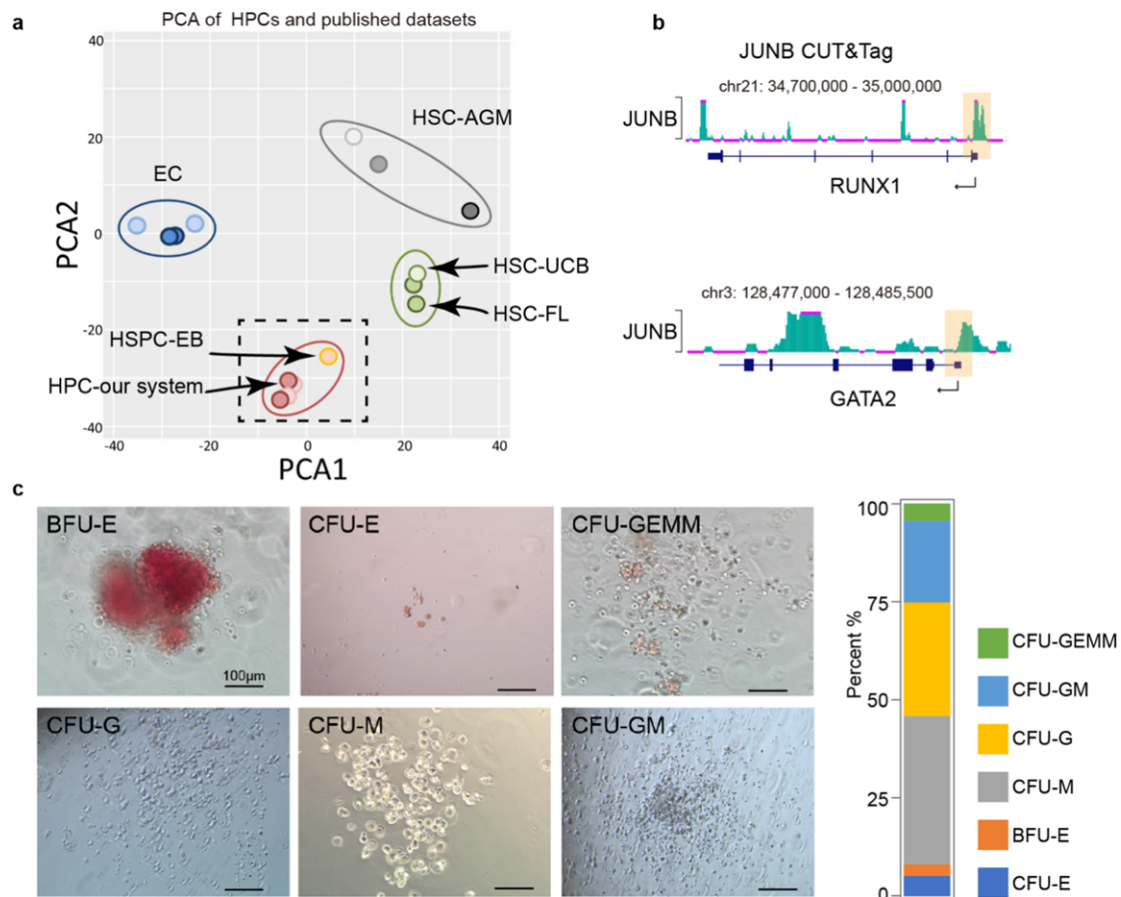

452

453 **Fig. R10. Characterization of hematopoiesis produced in this system.**

454 **a.** Principal component analysis (PCA) of HPC and HSPC samples based on their  
 455 transcriptome. **b.** The UCSC browser snapshots show the binding for JUNB at the genetic  
 456 loci of RUNX1 and GATA2. Promoters are highlighted in yellow. **c.** The pictures show the  
 457 results of the colony-forming assay for day 8 HPCs. Scale bars, 100  $\mu$ m. AGM: aorta-  
 458 gonad-mesonephros, CFU: colony-forming unit, BFU: burst-forming units, E: erythroid, EB:  
 459 embryoid body, FL: fetal liver, UCB: umbilical cord blood, M: macrophage, G: granulocyte,  
 460 GM: granulocyte-macrophage, GEMM: Granulocyte-Erythrocyte-Monocyte/macrophage-  
 461 Megakaryocyte.

462

463 **3. Please describe experimental design for experiments depicted in Fig.4. What**  
 464 **was the starting population for these experiments, isolated CD34<sup>+</sup> cells?**

465 **Response:** We thank the reviewer for pointing this out. The experimental  
 466 design is illustrated in Fig. R11.

467 In our protocol, hPSCs were first treated with BMP4 and CHIR99021 for 3 days  
 468 to induce KDR<sup>+</sup> vascular mesoderm cells (VMEs). The cells were then re-plated  
 469 in a medium supplemented with VEGF and bFGF for 2 days to induce CD34<sup>+</sup>

470 endothelial progenitor cells (EPCs). Afterwards, SB431542 was added to  
471 promote EHT to generate CD43<sup>+</sup> CD34<sup>+</sup> HPCs.

472 We took all the differentiating cells treated with SB431542 for 6 h on day 6 for  
473 single-cell RNA-seq analysis. This cell mixture contains EPCs, HEC  
474 undergoing EHT, and newly formed HPC, together with other mesoderm cell  
475 types. Analyzing this cell mixture by scRNA-seq will reveal different cell types  
476 in the culture during the EHT window and provide information about potential  
477 cell-cell interactions. **We have added this diagram to Fig. 4a of the revised**  
478 **manuscript.**

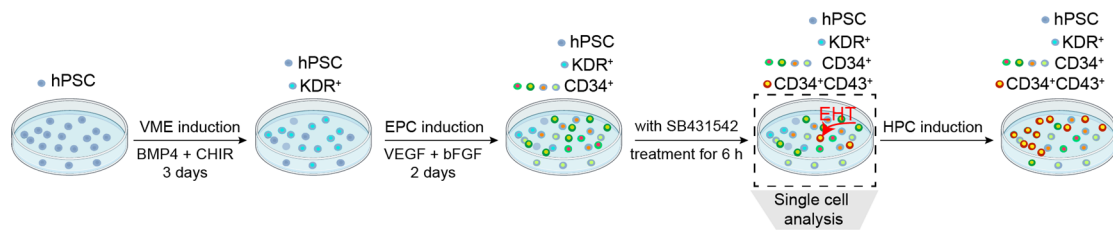

479

480 **Fig. R11. Schematic representation of the sampling collection for the**  
481 **scRNA-seq.**

482 Schematic showing the sequential processes of HPCs differentiation from hPSCs through  
483 the specification of mesoderm cells (VME, KDR<sup>+</sup>), formation of the CD34<sup>+</sup> endothelial  
484 progenitor cells (EPCs), and HPCs generation from CD34<sup>+</sup> HEC via EHT process.

485 [4. How hemogenic endothelial clusters and HPC clusters were identified? What](#)  
486 [are the differences in HPC-T1 and T2 clusters? Please provide in supplement](#)  
487 [RNAseq UMAP plots with marked RUNX1, CD44, SOX17, CDH5, and CD34](#)  
488 [expression.](#)

489 **Response:** We thank the reviewers for raising these critical questions.

490 Hemogenic endothelial cells (HECs) are specialized endothelial cells  
491 expressing endothelial and hematopoietic genes and are a relatively rare  
492 population both *in vivo*<sup>1, 14</sup> and *in vitro*<sup>15</sup>.

493 To identify HEC clusters, we first identified epithelial (Epi), mesenchymal (Mes),  
494 endothelial (EC), and hematopoietic progenitor cell (HPC) clusters from the  
495 whole cell population based on the transcriptional signature of each cell type  
496 (Fig. R12a). Next, the annotated EC and HPC populations were extracted, re-  
497 normalized, and separated into 5 sub-clusters (Fig. R12b). Among them, the  
498 sub-cluster expressing both endothelial genes (such as *GJA4*, *CD44*) and  
499 hematopoietic genes (such as *CLEC11A*) were annotated as the hemogenic  
500 endothelium (HE) cluster. The sub-cluster expressing hematopoietic genes  
501 such as *CLEC11A*<sup>16</sup> was annotated as pre-HPC clusters. Interestingly, we  
502 found the pre-HPC cluster could be divided into two groups based on the

503 expression level of cell cycle genes. Pre-HPC Type II (pre-HPC TII) group has  
 504 more cycling cells in either S or G2/M phase than the pre-HPC Type I (pre-HPC  
 505 TI) group. Besides, trajectory analysis revealed that the pre-HPC TII cluster has  
 506 a closer relationship to HE than the pre-HPC TI. These results suggest that pre-  
 507 HPC TII cells may be newly emerged hematopoietic cells which have just  
 508 completed the EHT process. Therefore, we use pre-HPC to refer to these early  
 509 HPCs at this stage (**Fig. 4, Fig.6, Lines 218-223, revised manuscript**).

510 Fig. R12.b showed the expression levels and distributions of RUNX1, CD44,  
 511 SOX17, CDH5, and CD34. SOX17, CDH5, and CD34 are more expressed by  
 512 AEC TI AEC TII cells on the left side, while RUNX1 and CD44 were higher in  
 513 pre-HPC TI and pre-HPC TII, and HE cells. **This result is added to the revised  
 514 manuscript Fig. S4c)**

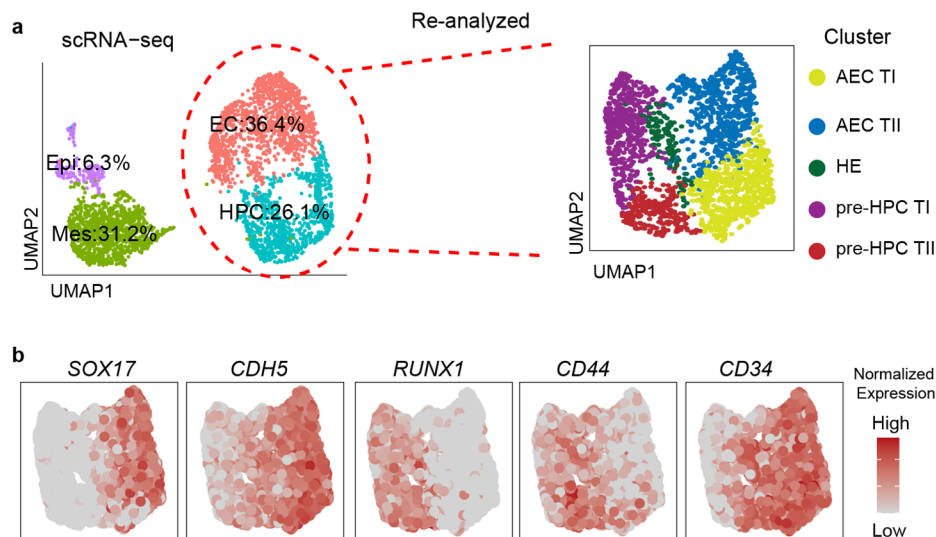

515

516 **Fig. R12. Single-cell transcriptomic analysis of differentiating cells at**  
 517 **day6.**

518 **a.** UMAP clustering plots showing that all cells are grouped into 4 clusters: Epi,  
 519 and HPC (left panel). The annotated EC and HPC were extracted, re-analyzed,  
 520 and separated into 5 sub-clusters: AEC TI, AEC TII, pre-HPC TI, pre-HPC TII,  
 521 and HE (right panel). **b.** The scatter plots show the expression and distribution of  
 522 SOX17, CDH5, RUNX1, CD44 and CD34. Epi: Epithelial cell, Mes: Mesoderm cell,  
 523 EC: Endothelial Cell, HPC: Hematopoietic Progenitor Cell. AEC TI: AEC Type I,  
 524 AEC TII: AEC Type II, HPC TI: HPC Type I, HPC TII: HPC Type II, HE, hemogenic endothelium.

525 **5. Authors found that hemogenic endothelium generated in hPSC cultures is**  
 526 **highly proliferative. What about CS13 HECs?**

527 **Response:** We thank the reviewer for this question. We performed cell cycle  
 528 analysis using the scRNA-seq data of CS13 HEC and found they are not as  
 529 proliferative as *in vitro* HEC. Please refer to our response to General Comment  
 530 1 (Fig. R1) for details.



531 6. In introduction, authors describe just two waves of embryonic hematopoiesis  
532 and failed to acknowledge its complexity and multiple waves (see DOI:  
533 10.1038/nrm.2016.127).

534 **Response:** We thank the reviewer for pointing this out. We sincerely apologize  
535 for this mistake and have revised the text in the introduction part as shown  
536 below **in our revised manuscript (page 2, Lines 33-42).**

537 Blood development in mammalian embryogenesis involves three waves of  
538 spatiotemporally distinct hematopoiesis<sup>17, 18</sup>. The first and second waves arise  
539 in the yolk sac and are considered extra-embryonic hematopoiesis<sup>18</sup>. The first  
540 wave is transitory and mainly produces primitive erythrocytes, supporting tissue  
541 oxygenation for the growing embryo<sup>18, 19</sup>. The second wave gives rise to  
542 multipotent progenitors, with erythro-myeloid progenitors (EMPs) and  
543 lymphoid-primed progenitors (LMPP), independent of hematopoietic stem cells  
544 (HSCs)<sup>20, 21</sup>. The third wave is intra-embryonic hematopoiesis, where definitive  
545 HSCs emerge from the dorsal aorta of the aorta-gonad-mesonephros (AGM)  
546 region<sup>22</sup>, and are capable of engrafting adult recipients<sup>23</sup>. In all three waves,  
547 HSCs are developed from a group of specialized hemogenic endothelial cells  
548 (HECs) via the endothelial-to-hematopoietic transition (EHT) <sup>1</sup>.

549 7. Authors claim that JUNB knockout did not impair the generation of CD34<sup>+</sup>  
550 EPCs. However, CD34 is broadly express in non-endothelial cell types. To  
551 ensure that this statement is correct, additional endothelial markers, such as  
552 VE-cadherin and CD31 should be evaluated in WT and KO cultures.

553 **Response:** We thank the reviewer for pointing this out. We checked endothelial  
554 markers CD31 and CD144, the percentage of CD31<sup>+</sup> and CD144<sup>+</sup> cells are  
555 similar in WT (45.7%, 36.5%), JUNB KO1 (47.3%, 36.2%) and JUNB KO2  
556 (44.4%, 33.7%) (Fig. R13). These results support our conclusion that the  
557 generation of CD34<sup>+</sup> EPCs is not affected by JUNB KO. **We have added these**  
558 **data in the revised manuscript (Fig. S6f, page 12, Lines 282-284).**

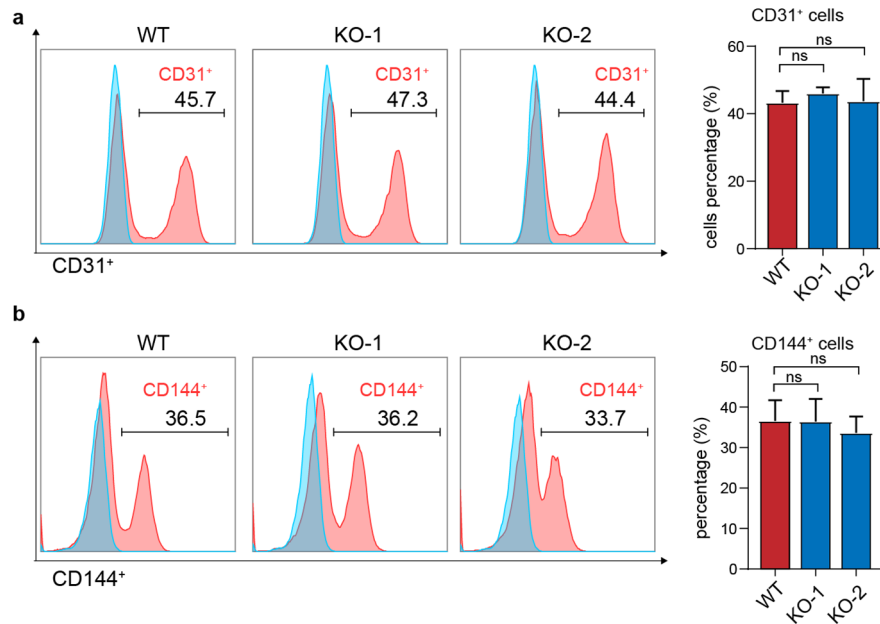

559

560 **Fig. R13. Characterization of CD34<sup>+</sup> EPC.**

561 **a, b.** Density plots showing flow cytometry results of CD34<sup>+</sup> endothelial progenitor cells  
 562 (EPC) for the surface markers CD31(**a**) and CD144(**b**). Positive cell percentages are  
 563 labeled. And quantification results are shown on the right. P-values were calculated using  
 564 Student's t-test, \*p-value < 0.05, \*\*p-value < 0.01, \*\*\*p-value < 0.001, p-value > 0.05 is  
 565 indicated by "ns" for not significant.

566 **Minor:**

567 1. Ref 5 and 6 are related to EHT in AGM region and are not related to EHT  
 568 during primitive hematopoiesis.

569 **Response:** We thank reviewer 2 for careful reading and have replaced Ref 5  
 570 and 6 with new Ref 8 in the revised manuscript.

571 2. Ref. 7 is incorrect. This reference describes the effect of VEGF and FGF2  
 572 on HUVECs and has nothing to do with mesodermal differentiation.

573 **Response:** We thank the reviewer for pointing this out, and we have now  
 574 removed Ref 7 and added new Ref 9 in the revised manuscript.

575 3. Line 50: hematopoietic endothelium should be hemogenic endothelium.

576 **Response:** We sincerely apologize for the mistake and have corrected this typo  
 577 in the revised manuscript.

578 4. In result section, please introduce hPSC line used in this study (H1 hESC).

579 **Response:** We thank the reviewer for pointing this out. We have added a brief  
 580 introduction of H1 hESC, as shown below. **We have also added this part to**

581 **the revised manuscript (Lines 75-77 and Lines 406-412, revised**  
582 **manuscript).**

583 The H1 cell line was obtained from WiCell and routinely maintained on MEF  
584 feeders in the hESC medium: KnockOut DMEM culture medium supplemented  
585 with 20% (vol/vol) KnockOut serum replacement, 1% nonessential amino acids  
586 (NEAA), 1 mM L-GlutaMAX-I, 0.1 mM  $\beta$ -mercaptoethanol, and 8 ng/mL bFGF.  
587 They were passaged with 1 mg/mL collagenase IV (Invitrogen) and seeded  
588 onto a 25 cm<sup>2</sup> flask that had been pre-coated with 0.1% gelatin solution (Sigma  
589 Aldrich). For differentiation, hESCs were maintained on vitronectin or Matrigel  
590 (BD Biosciences)-coated plates (Corning) in E8 medium (STEMCELL  
591 Technologies). We have now added these descriptions to the revised  
592 manuscript.

593 5. Line 140. SOX17 is involved in EHT, the major function of this gene is to  
594 promote arterial commitment.

595 **Response:** We thank the reviewer for the correction, and we have revised this  
596 in the revised manuscript (**page 6, Lines 137-138**).

597 6. Line 168. Correct H3K37me3 typo.

598 **Response:** We sincerely apologize for this mistake. We have now corrected  
599 this typo.

600 7. Line 273. FLK1 differences are negligible and not significant. Word  
601 "noticeable" should not be used. Please use the current KDR nomenclature for  
602 FLK1.

603 **Response:** We thank the reviewer for pointing this out, and we have changed  
604 FLK1 to KDR in the revised manuscript.

605

606

607 **Reviewer #3 (Remarks to the Author):**

608 To understand the mechanism of HSPC fate determination in humans, the  
609 authors dissect the epigenomic roadmap from hPSCs to HSPCs by profiling  
610 chromatin accessibility, histone modifications and transcriptome. Generally, the  
611 epigenetic feature dynamics and gene expression dynamics are highly  
612 correlated during differentiation. For the chromatin accessibility, the regulatory  
613 regions become accessible before key TF binding to the chromatin. For the  
614 histone modifications, the bivalent genes are characterized by stage-specific  
615 H3K4me3 and H3K27me3 during HSPC differentiation. Specifically, they reveal  
616 that EHT contains several intermediate subpopulations with unique  
617 transcriptome and chromatin states. Furthermore, they identify JUNB as a new

618 regulator of HSPC differentiation and the deficiency of JUNB by iCRISPR will  
619 impair HEC formation and EHT.

620 **Response:** We thank the reviewer for these comments.

621 **Major comments:**

622 1. Whether the differentiation protocol used in this study can generate  
623 functional HSPCs with complete self-renewal and engraftment abilities remains  
624 unknown.

625 **Response:** We thank the reviewer for this important comment. We have  
626 performed transplantation of our hPSC-derived HSPCs into irradiated NSG  
627 (NOD.Cg-Prkdc Il2rg/SzJ) mice and did not detect any reconstitution. Therefore,  
628 they are more likely to be primitive CD43<sup>+</sup> HSPCs, with low self-renewal and  
629 reconstitution ability *in vivo*.

630 Although significant progress has been made in the field of hematopoietic  
631 differentiation from hPSCs, including the establishment of multiple  
632 hematopoietic differentiation protocols and the generation of functional blood  
633 cells<sup>24, 25</sup>, hPSC-derived HSPCs cannot reconstitute hematopoiesis in NOG-  
634 SCID mice. The generation of definitive HSCs from PSCs has been a long-  
635 sought goal. A study by Sugimura showed that after transduced with seven  
636 transcription factors (ERG, HOXA5, HOXA9, HOXA10, LCOR, RUNX1, and  
637 SPI1), hESC-derived HE cells acquire the definitive hematopoietic potential and  
638 reconstitute hematopoiesis in NOG-SCID mice<sup>10</sup>. However, for the clinical  
639 application of hPSC-derived HSCs, it is better to avoid the ectopic expression  
640 of hematopoietic TFs.

641 As the epigenetic landscape defines the cell fate and potentials, we think a  
642 better understanding of the epigenomic roadmap of the HSPC *in vitro*  
643 differentiation process will bring insights into how to improve the culture  
644 condition and help to discover new regulators and principles.

645 2. Related to comment #1, if the generation of HSPC with complete engraftment  
646 ability is difficult to achieve, whether the profiling of epigenetic features and  
647 transcriptome features in this study can resolve the bottleneck of induction of  
648 real HSPC *in vitro*.

649 **Response:** We thank the reviewer for raising this question. Although we did  
650 not solve the current bottleneck in the present study, as mentioned above, our  
651 findings have provided new insights about the critical difference between *in vitro*  
652 and *in vivo* HECs and HSPCs, and the directions to optimize the differentiation  
653 protocol.

654 A recent scRNA-seq study profiling early embryonic hematopoiesis in human  
655 embryos showed that the HEC group could be divided into two temporally and

656 molecularly distinct populations. The earlier emerging population lacks arterial  
 657 features, while the later emerging HSC-primed HEC population shows  
 658 distinctive arterial endothelial features<sup>26</sup>. By comparing the single-cell  
 659 transcriptomes of *in vitro* generated HEC with those generated *in vivo*, we  
 660 identified molecular pathways and regulators as potential targets for improving  
 661 HSPC differentiation *in vitro*. For example, genes responsible for arterial  
 662 endothelium development (such as DLL4, SOX17) are expressed at lower  
 663 levels in the *in vitro* produced HECs than CS13 HECs, which are considered  
 664 HSC primed HECs (Fig. R14a). They are both bivalent genes, and the  
 665 H3K27me3 marks are not removed in EPC and HPC stages, which may  
 666 account for their low expression in *in vitro* HECs and HPCs (Fig. R14b).

667 Through inferring TF binding sites from the open chromatin landscape and  
 668 analyzing the dynamic change of the bivalent chromatin, we uncovered  
 669 interesting principles about cell fate transitions during HPC specification. HOXA  
 670 genes involved in definitive HSC formation are also bivalent genes covered with  
 671 heavy H3K27me3 marks in EPC and HPC stages (Fig. 3j), and they remain  
 672 poised due to the repressive chromatin states. As H3K27me3 modification is  
 673 catalyzed by the PRC2 complex, treating cells with PRC2 inhibitors may help  
 674 to activate more definitive HSC TFs. Comparison analysis of HECs from *in vivo*  
 675 and *in vitro* indicated that promoting arterial endothelial features, culture in  
 676 hypoxia condition, and cell cycle adjustment may also enhance the potential of  
 677 *in vitro* differentiated HECs to form definitive hematopoietic stem cells (HSCs).  
 678 The chromatin analysis and transcriptome profiling also lead us to discover  
 679 JUNB as a new regulator for HEC and HPC formation from hPSCs.

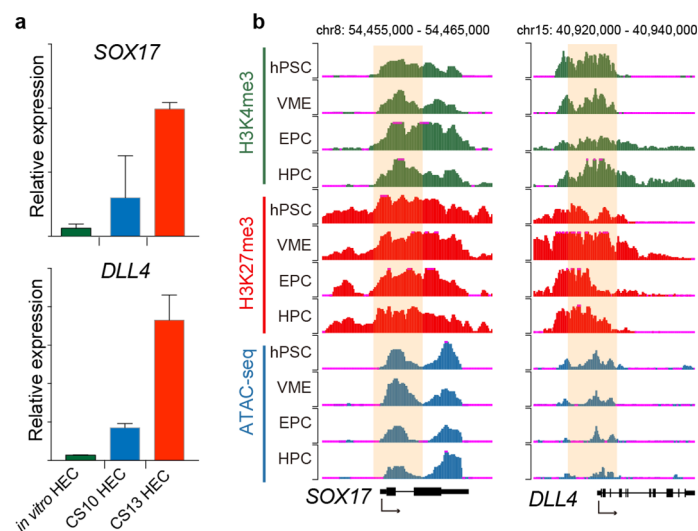

680

681 **Fig. R14. Gene expression profile and their chromatin state.**

682 **a.** Bar plot showing the expression levels of SOX17 and DLL4 in CS10 HEC, CS13HEC,  
 683 and *in vitro* HEC, respectively. **b.** The UCSC browser views show the H3K4me3,

684 H3K27me3, and chromatin state at the SOX17 and DLL4 gene loci. The promoter regions  
685 are highlighted in yellow.

686 3. Sc-RNAseq data showed that Junb is expressed in EC and HPC populations.  
687 Functional analysis of Junb showed that it could regulate hematopoietic  
688 specification and ChIP-seq data showed hematopoietic genes were direct  
689 targets of JUNB. However, how JUNB regulates hematopoietic TFs specifically  
690 remains unclear.

691 **Response:** We thank the reviewer for these questions. In our study, we found  
692 that the JUNB motif is significantly enriched in the open chromatin of EPCs,  
693 implying it may have an important function there. The RNA-seq results also  
694 show that many HEC formation and EHT related genes are down-regulated  
695 upon JUNB KO (Fig. 7e). We performed JUNB CUT&Tag<sup>27</sup> and the results  
696 reveal that it can bind to the promoters of known key hematopoietic regulators  
697 (such as RUNX1, CD44) (Fig. 7f). Thus, JUNB can directly regulate the  
698 expression of HEC and EHT related TFs.

699 Several studies reported that AP-1 could function as a pioneer factor to remodel  
700 the chromatin landscape, therefore affecting chromatin accessibility.  
701 Subsequently, lineage-specific TFs are recruited by AP-1 to the target genes to  
702 establish cell identities<sup>28, 29</sup>. We hypothesized that JUNB might also be a  
703 pioneer factor during HPC differentiation, making specific chromatin regions  
704 more accessible for hematopoietic TFs.

705 To test this hypothesis, we performed ATAC-seq on WT and JUNB KO HECs.  
706 We found a significant portion (20705/60761, 34.1%) of open regions are  
707 attenuated due to ablation of JUNB (Fig. R15a). We call these regions JUNB  
708 dependent sites. Motif analysis reveals significant enrichment of the JUNB  
709 motif at the JUNB dependent sites (Fig. R15b). Besides, hematopoietic TF  
710 motifs, such as ERG, GATA2, and RUNX1, are also enriched at JUNB  
711 dependent sites (Fig. R15b). These results support the hypothesis that JUNB  
712 may be a pioneer factor for other hematopoietic TFs.

713 The above results suggest that JUNB may regulate hematopoietic TFs by two  
714 mechanisms: open up specific chromatin regions to facilitate the deposition of  
715 hematopoietic master TFs and directly bind to the promoter of important  
716 hematopoietic genes. **We have added these results to the revised  
717 manuscript (Fig. 7f, Fig. S7b, c, page 12, Lines 295-308; page 15, Lines  
718 376-379).**

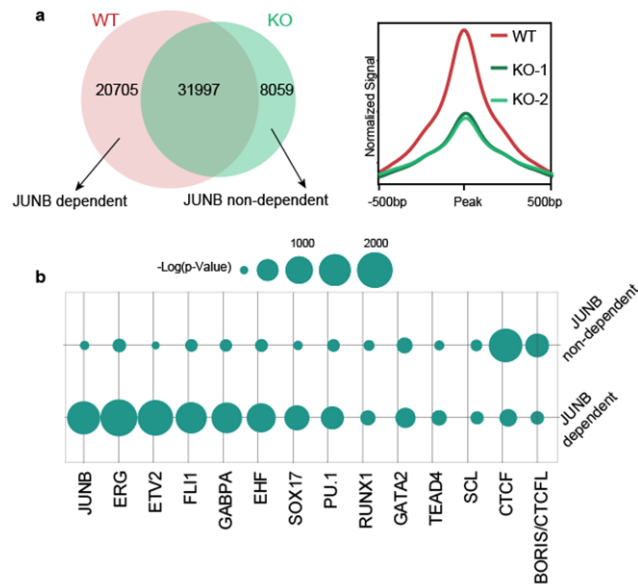

719

720 **Fig. R15. The chromatin accessibility in WT- and JUNB null HEC.**

721 **a.** left, Venn plot showing ATAC-seq peaks in WT and JUNB KO HECs, respectively. right,  
 722 Metaplot showing the levels of ATAC-seq signals at JUNB dependent sites in WT and  
 723 JUNB KO HECs. Right, Metaplot showing the levels of ATAC-seq signals at JUNB  
 724 dependent sites in WT and JUNB null HECs. **b.** Bar plot showing TF motifs enriched from  
 725 JUNB dependent peaks. P-values are estimated by HOMER.

726 **4. JUNB deficiency impaired HEC and HSPC differentiation *in vitro*. Whether**  
 727 **it can play the similar *in vivo*? Can overexpression of JUNB facilitate**  
 728 **the generation of functional human HSCs *in vitro*?**

729 **Response:** We thank the reviewer for these important questions. For the first  
 730 question, *junb* KO mice die between E7.5-10.5 and the prominent phenotype is  
 731 poor development of yolk sac and placenta vasculature<sup>30</sup>. We think it is likely  
 732 that JUNB may regulate hematopoiesis in the early human embryo. We  
 733 analyzed the scRNA-seq data of CS10 and CS13 HECs. JUNB is expressed at  
 734 higher levels in *in vivo* HECs than *in vitro* HECs (Fig. R16a). Data mining from  
 735 another scRNA-seq study revealed that JUNB is also highly expressed in *in*  
 736 *in vivo* HSPC compared to HSPCs generated from hPSC<sup>31</sup> (Fig. R16b). In the *in*  
 737 *in vitro* differentiation system, JUNB KO severely affected HEC and HPC  
 738 formation. At the chromatin level, JUNB bind to the promoter of key  
 739 hematopoietic TFs such as RUNX1, and JUNB KO lead to reduced open  
 740 chromatin regions bind by many hematopoietic TFs (Fig. R15). The above  
 741 results illustrate that JUNB is expressed at the right place and time during early  
 742 human embryo hematopoiesis. The loss-of-function study revealed that JUNB  
 743 could impact the expression and chromatin binding of many hematopoietic  
 744 regulators during HEC formation and the EHT window. Therefore, we speculate  
 745 it is also involved in *in vivo* HEC and HSC formation. **We have now added this**  
 746 **part to the discussion in the revised manuscript (Fig. 6e, Lines 388-395).**

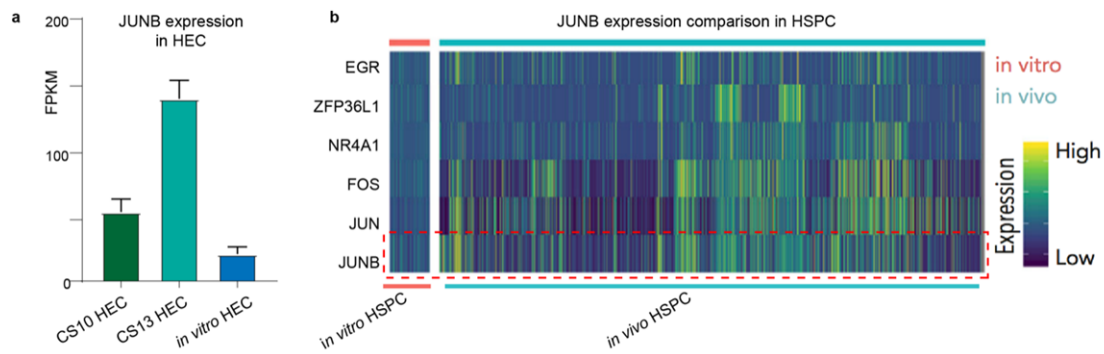

747

748 **Fig. R16. Comparison of JUNB expression in *in vitro* and *in vivo* HEC and**  
 749 **HSPC.**

750 **a.** Bar plot showing the JUNB expression levels in CS10 HEC, CS13 HEC, and *in vitro*  
 751 HEC. **b.** Heatmap showing JUNB expression levels in *in vitro* HSPC and *in vivo* HSPC

752 (Modified from Figure 5E in Fidanza et al. a)<sup>31</sup>.

753 For the second question, we constructed doxycycline (DOX) inducible JUNB  
 754 overexpression H1 hESC line. DOX was added from differentiation day 3 to  
 755 induce JUNB expression (Fig. R17a). The percentage of HEC and HPC  
 756 increases only slightly compared to WT cells. We also transplanted JUNB OE  
 757 HPCs into 10 irradiated NSG (NOD.Cg-Prkdc Il2rg/SzJ) mice but did not detect  
 758 any reconstitution. We speculate that JUNB may also be a context-dependent  
 759 pioneer factor in making nearby recognition sites accessible for master  
 760 hematopoietic TFs. It might be worthwhile to co-express JUNB with other  
 761 hematopoietic TFs to see whether this can improve the efficiency of HPC  
 762 differentiation *in vitro*. **We have now added these data in Fig. S7e-g, and in**  
 763 **the discussion, page 15, Lines 381-382.**

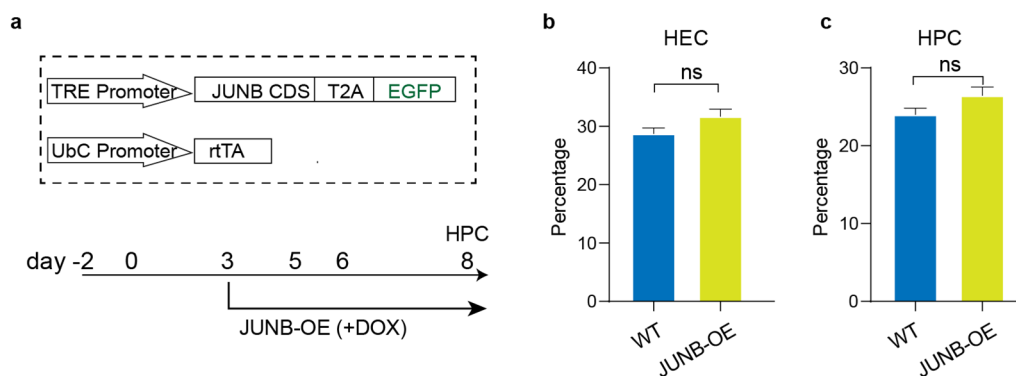

764

765 **Fig. R17. JUNB overexpression inhibits HPC differentiation.**

766 **a.** Schematic illustrating the JUNB inducible expression constructs and the induction time  
 767 window. **b, c.** Bar plots showing the percentage of HEC (CD34<sup>+</sup> CD73<sup>-</sup> CD184<sup>-</sup>) and HPC  
 768 (CD34<sup>+</sup> CD43<sup>+</sup>) on differentiation day 6 (**b**) and day 8 (**c**) in WT and JUNB OE cells. \*p-  
 769 value < 0.05, \*\*p-value < 0.01, \*\*\*p-value < 0.001, p-value > 0.05 is indicated by "ns" for  
 770 not significant.



771 **Minor comments:**

772 1. The y-axis of Fig 4h is not labeled.

773 **Response:** We thank the reviewer for pointing this out, and we have amended  
774 this in the revised manuscript (**Fig. 4i, revised**).

775 2. The result of Fig 4g shows the developmental path of EHT, have you tried  
776 other analysis methods, such as **RNA velocity** to validate this result?

777 **Response:** We thank the reviewers for this valuable suggestion. We have now  
778 repeated this analysis using the RNA velocity algorithm<sup>32</sup>. The new result also  
779 shows that HE is in the interface of the AEC cluster and HPC cluster, which is  
780 consistent with the pseudotime analysis result (Fig 4h) using Monocle 2<sup>33</sup>.

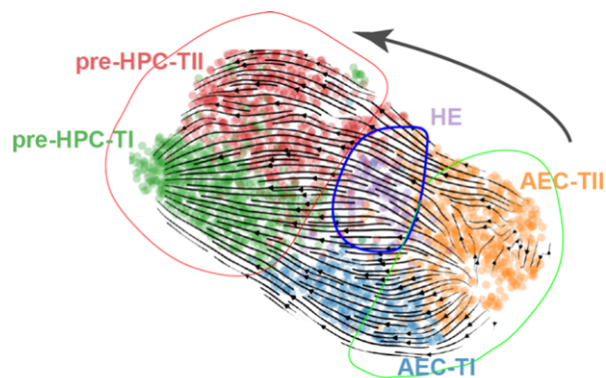

781

782 **Fig. R18. RNA velocity analysis of ECs and HPCs.**

783 RNA velocity fields visualized on UMAP projection of sub-clusters.

784 3. Since a lot of sequencing omics data have been obtained, why not building  
785 a website to display all the omics data in a visual way so that readers can better  
786 use this information?

787 **Response:** We thank the reviewer for this valuable suggestion. We have set  
788 up to view all our datasets using the UCSC Genome Browser. The link of RNA-  
789 seq, ChIP-seq, and ATAC-seq datasets of hPSC to HPCs is  
790 <ftp://166.111.152.245:2100/chenxia/hubDirectory/hub.txt>. To view these tracks,  
791 one can click into the navigation bar "My Data" and then "Track Hubs" to reach  
792 the Track Hubs page on the UCSC Genome Browser. Then one can paste in  
793 "ftp://166.111.152.245:2100/chenxia/hubDirectory/hub.txt" and click the  
794 "Connect" button to see the data from our Hub. The process is as follows:

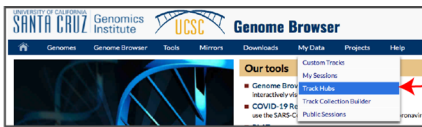

First step: click into "Track Hubs".

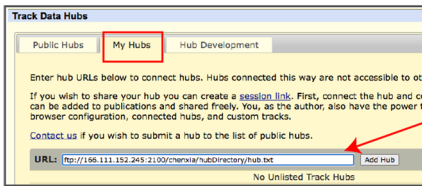

Second step: input  
"ftp://166.111.152.245:2100/chenxia/hubDirectory/hub.txt".

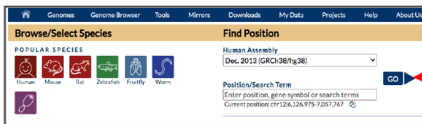

Third step: click "GO".

795

796 And the link of the single-cell database is <http://166.111.152.245:3850/>, where  
797 one can input genes of interest and see their expression in different cell clusters.

798

799 Reference:

- 800 1. Y Zeng, *et al.* Tracing the first hematopoietic stem cell generation in human embryo  
801 by single-cell RNA sequencing. *Cell research* **29**, 881-894 (2019).
- 802 2. J Ernst&M Kellis. Chromatin-state discovery and genome annotation with  
803 ChromHMM. *Nature Protocols* **12**, 2478-2492 (2017).
- 804 3. NS Christophersen&K Helin. Epigenetic control of embryonic stem cell fate. *J Exp*  
805 *Med* **207**, 2287-2295 (2010).
- 806 4. BE Bernstein, *et al.* A bivalent chromatin structure marks key developmental genes in  
807 embryonic stem cells. *Cell* **125**, 315-26 (2006).
- 808 5. NJ Palpant, *et al.* Chromatin and Transcriptional Analysis of Mesoderm Progenitor  
809 Cells Identifies HOPX as a Regulator of Primitive Hematopoiesis. *Cell Rep* **20**, 1597-  
810 1608 (2017).
- 811 6. SL Paige, *et al.* A Temporal Chromatin Signature in Human Embryonic Stem Cells  
812 Identifies Regulators of Cardiac Development. *Cell* **151**, 221-232 (2012).
- 813 7. H Yu, *et al.* Downregulation of Prdm16 mRNA is a specific antileukemic mechanism  
814 during HOXB4-mediated HSC expansion in vivo. *Blood* **124**, 1737-1747 (2014).
- 815 8. HJ Lawrence, *et al.* Loss of expression of the Hoxa-9 homeobox gene impairs the  
816 proliferation and repopulating ability of hematopoietic stem cells. *Blood* **106**, 3988-  
817 3994 (2005).
- 818 9. DR Dou, *et al.* Medial HOXA genes demarcate haematopoietic stem cell fate during  
819 human development. *Nat Cell Biol* **18**, 595-606 (2016).
- 820 10. R Sugimura, *et al.* Haematopoietic stem and progenitor cells from human pluripotent  
821 stem cells. *Nature* **545**, 432-+ (2017).
- 822 11. ES Ng, *et al.* Differentiation of human embryonic stem cells to HOXA(+) hemogenic  
823 vasculature that resembles the aorta-gonad-mesonephros. *Nat Biotechnol* **34**, 1168-  
824 1179 (2016).
- 825 12. GI Uenishi, *et al.* NOTCH signaling specifies arterial-type definitive hemogenic  
826 endothelium from human pluripotent stem cells. *Nat Commun* **9**, 1828 (2018).
- 827 13. M Oatley, *et al.* Single-cell transcriptomics identifies CD44 as a marker and regulator  
828 of endothelial to haematopoietic transition. *Nature Communications* **11**, 586 (2020).
- 829 14. LC Goldie, JL Lucitti, ME Dickinson&KK Hirschi. Cell signaling directing the formation  
830 and function of hemogenic endothelium during murine embryogenesis. *Blood* **112**,  
831 3194-204 (2008).
- 832 15. KD Choi, *et al.* Identification of the hemogenic endothelial progenitor and its direct  
833 precursor in human pluripotent stem cell differentiation cultures. *Cell Rep* **2**, 553-67  
834 (2012).
- 835 16. A Hiraoka, *et al.* Cloning, expression, and characterization of a cDNA encoding a  
836 novel human growth factor for primitive hematopoietic progenitor cells. *P Natl Acad*  
837 *Sci USA* **94**, 7577-7582 (1997).
- 838 17. A Ditadi, CM Sturgeon&G Keller. A view of human haematopoietic development from  
839 the Petri dish. *Nat Rev Mol Cell Bio* **18**, 56-67 (2017).

- 840 18. A Ivanovs, *et al.* Human haematopoietic stem cell development: from the embryo to  
841 the dish. *Development* **144**, 2323-2337 (2017).
- 842 19. SH Orkin&LI Zon. Hematopoiesis: An evolving paradigm for stem cell biology. *Cell*  
843 **132**, 631-644 (2008).
- 844 20. C Boiers, *et al.* Lymphomyeloid Contribution of an Immune-Restricted Progenitor  
845 Emerging Prior to Definitive Hematopoietic Stem Cells. *Cell Stem Cell* **13**, 535-548  
846 (2013).
- 847 21. KE McGrath, *et al.* Distinct Sources of Hematopoietic Progenitors Emerge before  
848 HSCs and Provide Functional Blood Cells in the Mammalian Embryo. *Cell Rep* **11**,  
849 1892-1904 (2015).
- 850 22. A Medvinsky&E Dzierzak. Definitive hematopoiesis is autonomously initiated by the  
851 AGM region. *Cell* **86**, 897-906 (1996).
- 852 23. AM Muller, A Medvinsky, J Strouboulis, F Grosveld&E Dzierzak. Development of  
853 Hematopoietic Stem-Cell Activity in the Mouse Embryo. *Immunity* **1**, 291-301 (1994).
- 854 24. II Slukvin. Generating human hematopoietic stem cells in vitro - exploring endothelial  
855 to hematopoietic transition as a portal for stemness acquisition. *Febs Lett* **590**, 4126-  
856 4143 (2016).
- 857 25. R Sugimura, *et al.* Haematopoietic stem and progenitor cells from human pluripotent  
858 stem cells. *Nature* **545**, 432-438 (2017).
- 859 26. Y Zeng, *et al.* Tracing the first hematopoietic stem cell generation in human embryo  
860 by single-cell RNA sequencing. *Cell Res* **29**, 881-894 (2019).
- 861 27. HS Kaya-Okur, *et al.* CUT&Tag for efficient epigenomic profiling of small samples  
862 and single cells. *Nature Communications* **10**, (2019).
- 863 28. RI Martinez-Zamudio, *et al.* AP-1 imprints a reversible transcriptional programme of  
864 senescent cells. *Nat Cell Biol* **22**, 842-855 (2020).
- 865 29. RI Sherwood, *et al.* Discovery of directional and nondirectional pioneer transcription  
866 factors by modeling DNase profile magnitude and shape. *Nat Biotechnol* **32**, 171-178  
867 (2014).
- 868 30. M Schorpp-Kistner, ZQ Wang, P Angel&EF Wagner. JunB is essential for mammalian  
869 placentation. *Embo J* **18**, 934-948 (1999).
- 870 31. A Fidanza, *et al.* Single-cell analyses and machine learning define hematopoietic  
871 progenitor and HSC-like cells derived from human PSCs. *Blood* **136**, 2893-2904  
872 (2020).
- 873 32. G La Manno, *et al.* RNA velocity of single cells. *Nature* **560**, 494-+ (2018).
- 874 33. C Trapnell, *et al.* The dynamics and regulators of cell fate decisions are revealed by  
875 pseudotemporal ordering of single cells. *Nat Biotechnol* **32**, 381-U251 (2014).

876

## **REVIEWERS' COMMENTS**

Reviewer #1 (Remarks to the Author):

The authors have done extensive revisions, including new analysis and experiments as well as clarification of the data presentation and message. They have addressed the primary concerns of this reviewer. I am satisfied with the revised paper which is clearly improved.

Reviewer #2 (Remarks to the Author):

All my concerns are adequately addressed. I have minor comment regarding defining the hemogenic endothelium as CD184- cells. Indeed, the emerging hemogenic endothelial cells do not express CXCR4 or other arterial markers. However, CXCR4 and DLL4 arterial markers became expressed in hemogenic endothelium following acquisition arterial features. As shown in mice and human PSC system arterialized CXCR4+ hemogenic endothelium possess strong HSC and lymphomyeloid potentials <https://pubmed.ncbi.nlm.nih.gov/34525376/> , <https://pubmed.ncbi.nlm.nih.gov/35332125/>, <https://pubmed.ncbi.nlm.nih.gov/29791856/>, <https://pubmed.ncbi.nlm.nih.gov/33596423/>

Reviewer #3 (Remarks to the Author):

The authors have adequately addressed all of my previous concerns, I congratulate them for the nice work, and the revised manuscript now is suitable for publication in Nature Communication.
